# Supplementary figures and images for: Multi-component heteroarene couplings via polarity-reversed radical cascades
Source: Royal Society of Chemistry journal article supplement (doi:10.1039/c9cc03498f), 2019-01-01

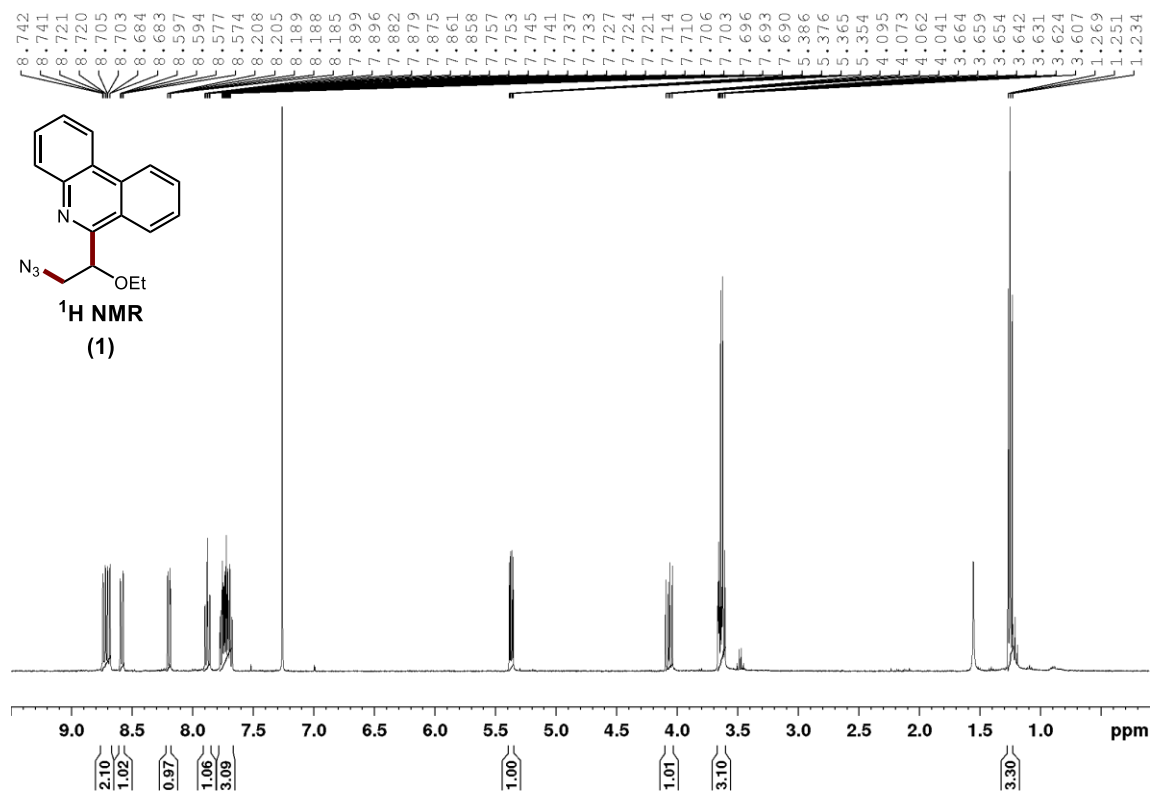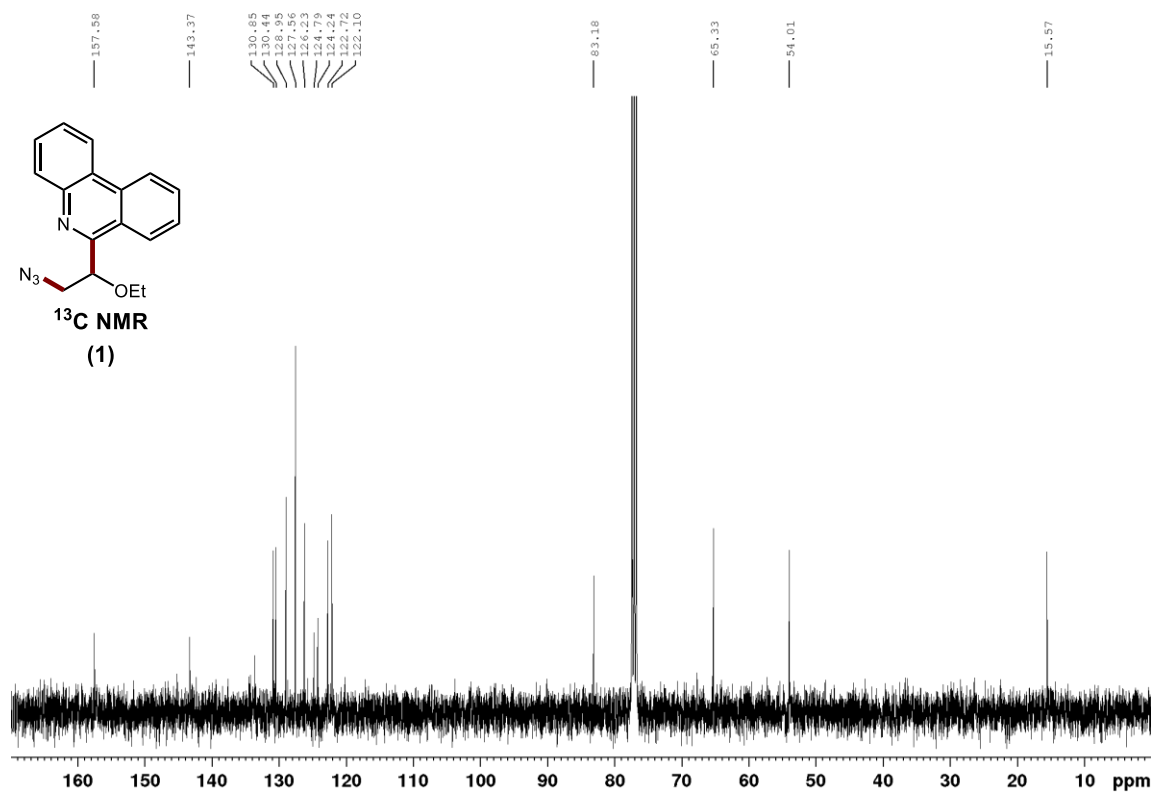

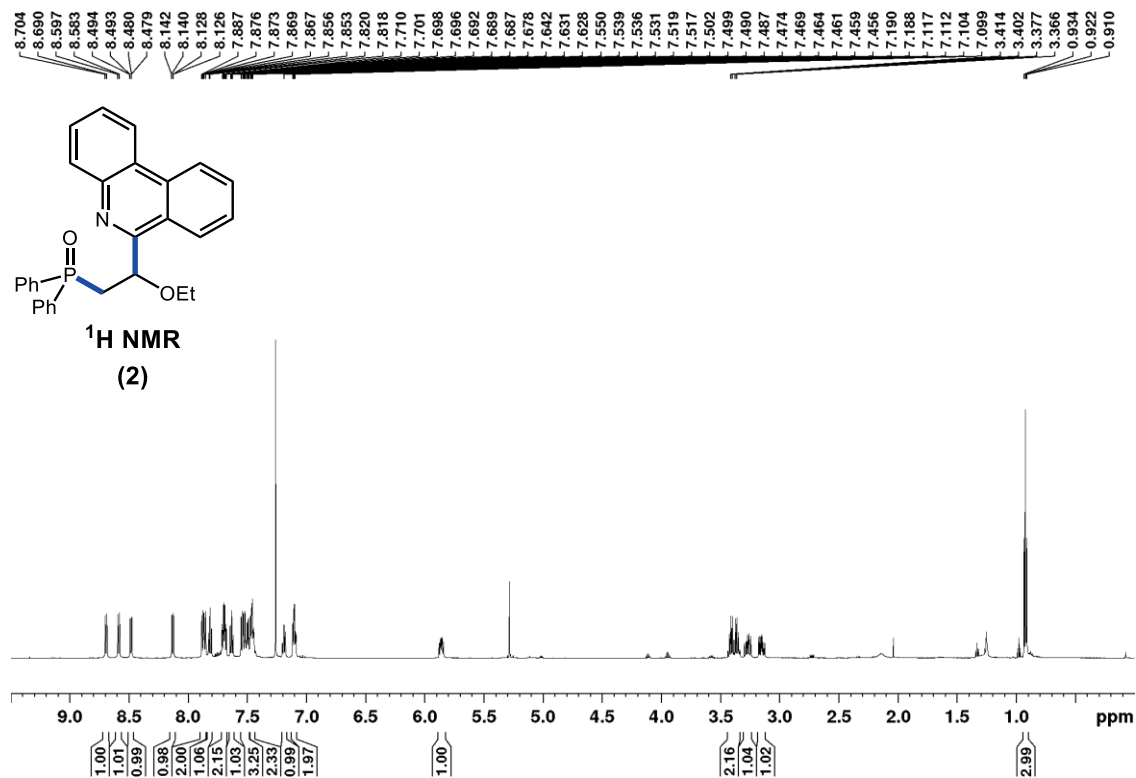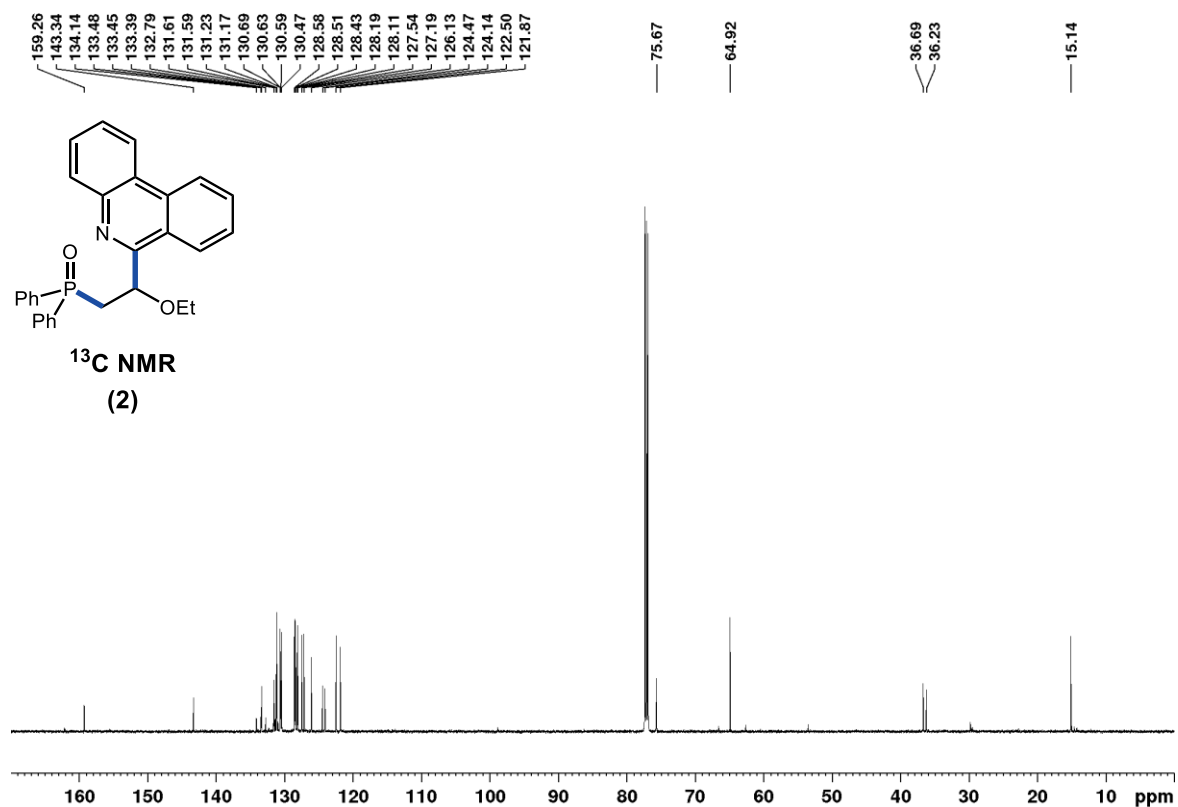

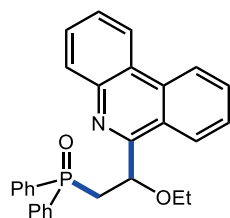

**$^{31}\text{P}$  NMR  
(2)**

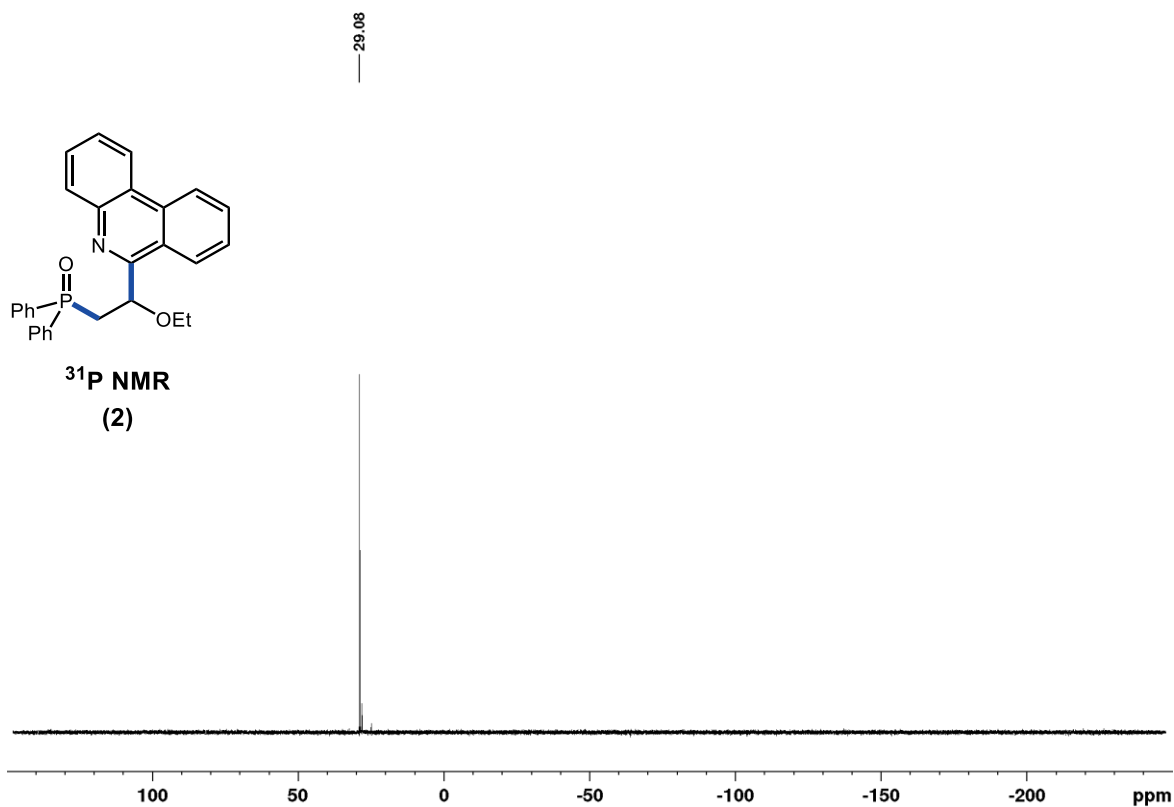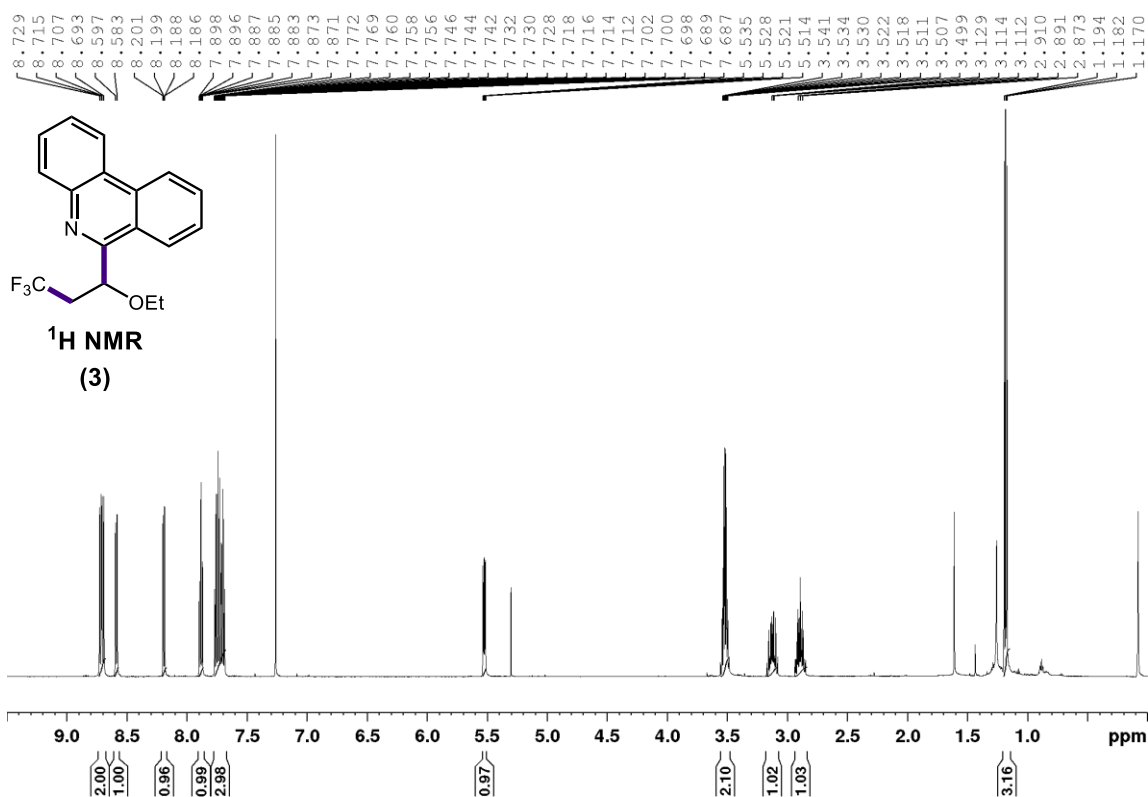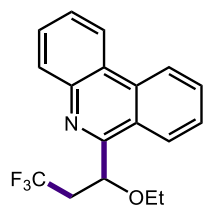

**$^1\text{H}$  NMR  
(3)**

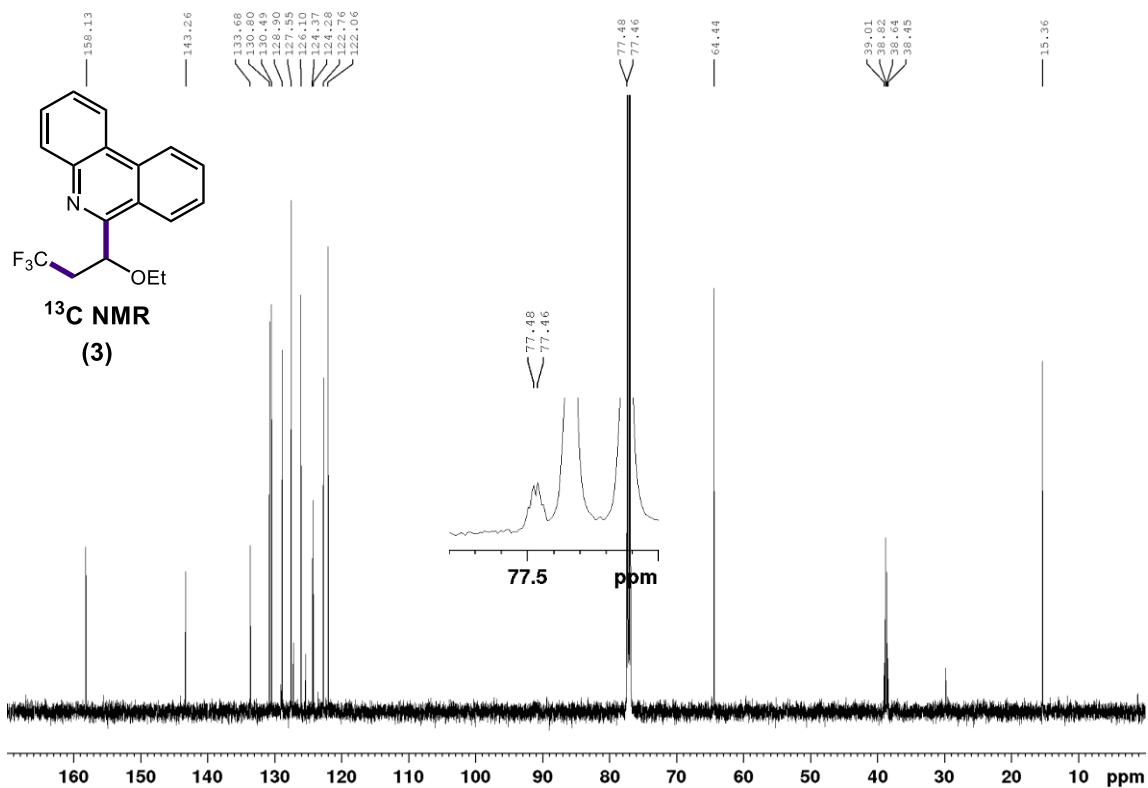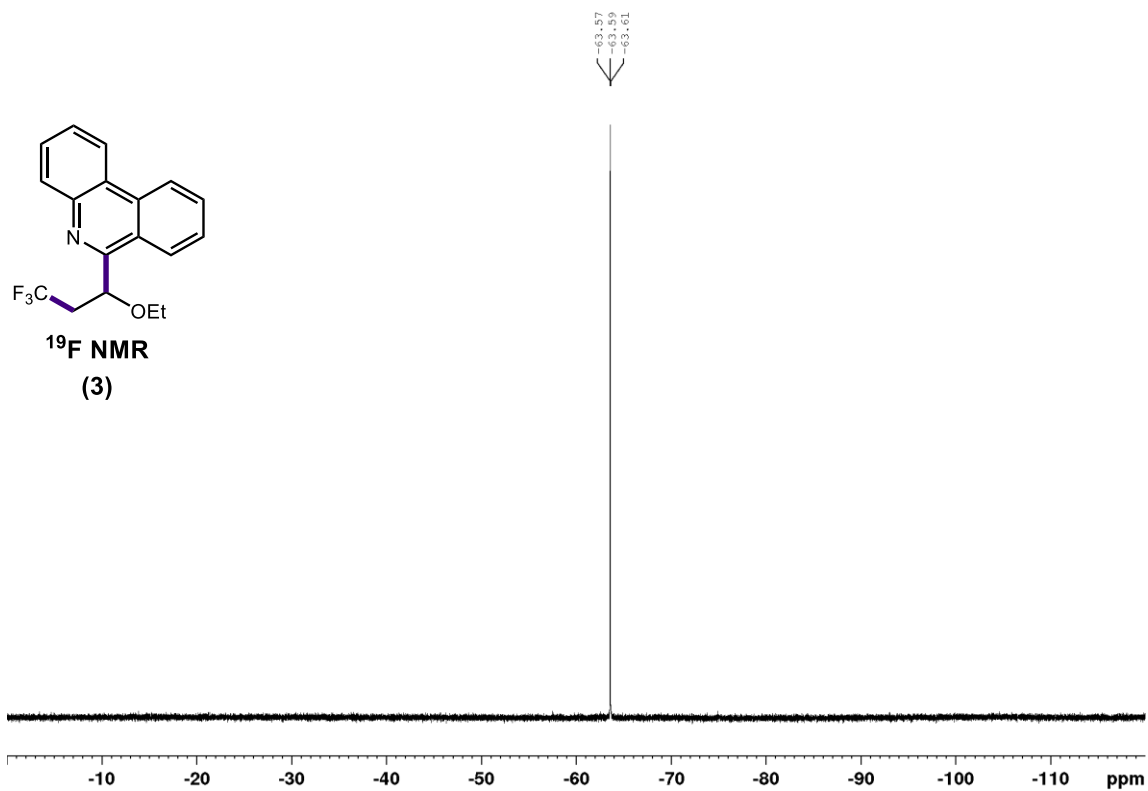

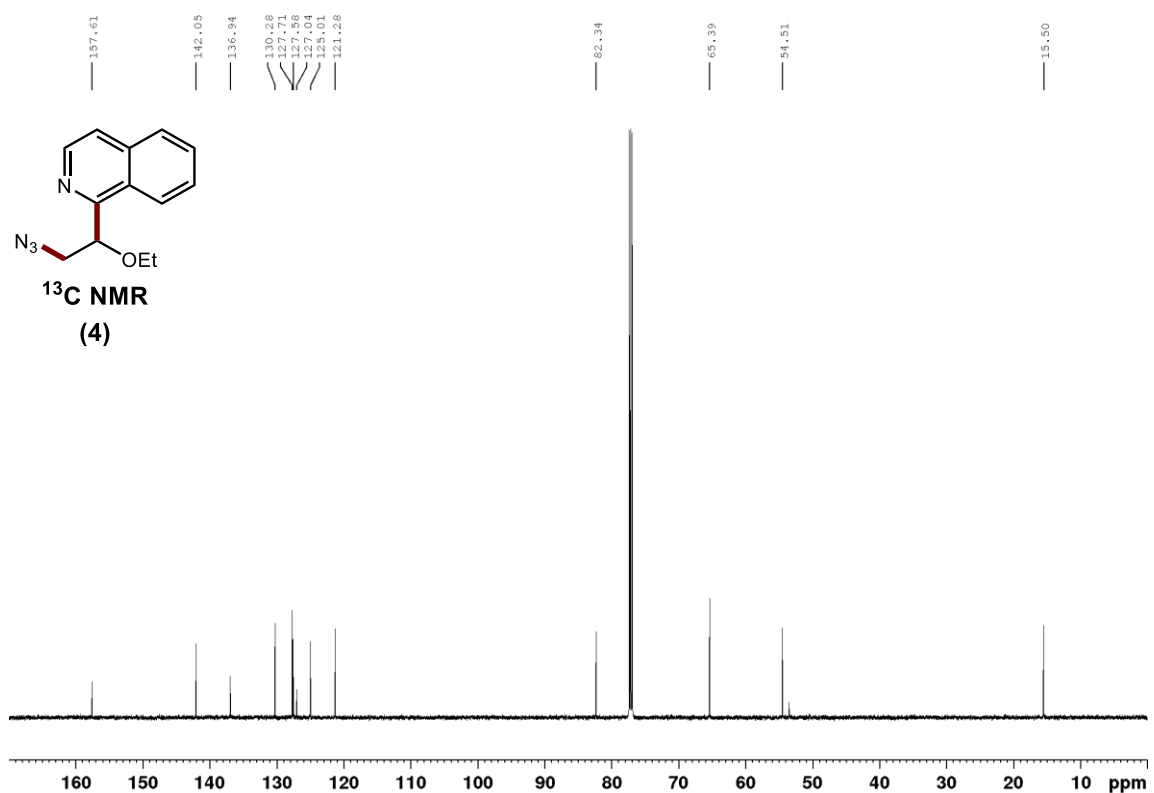

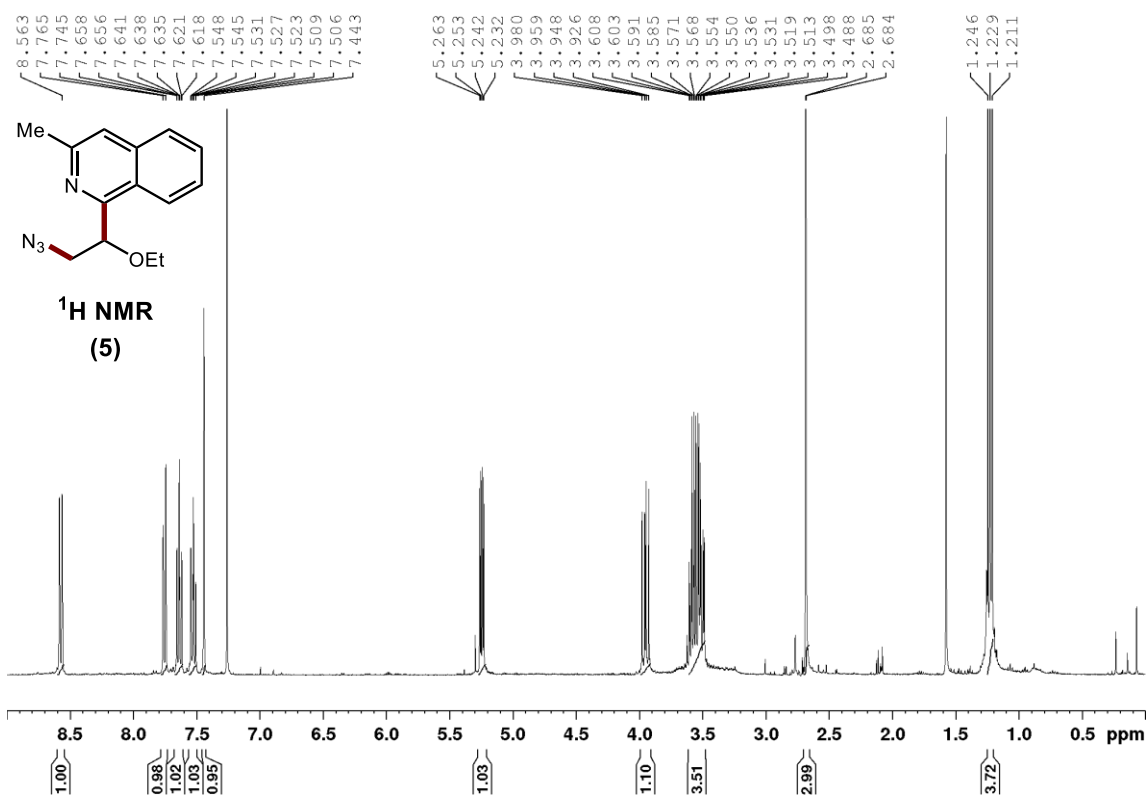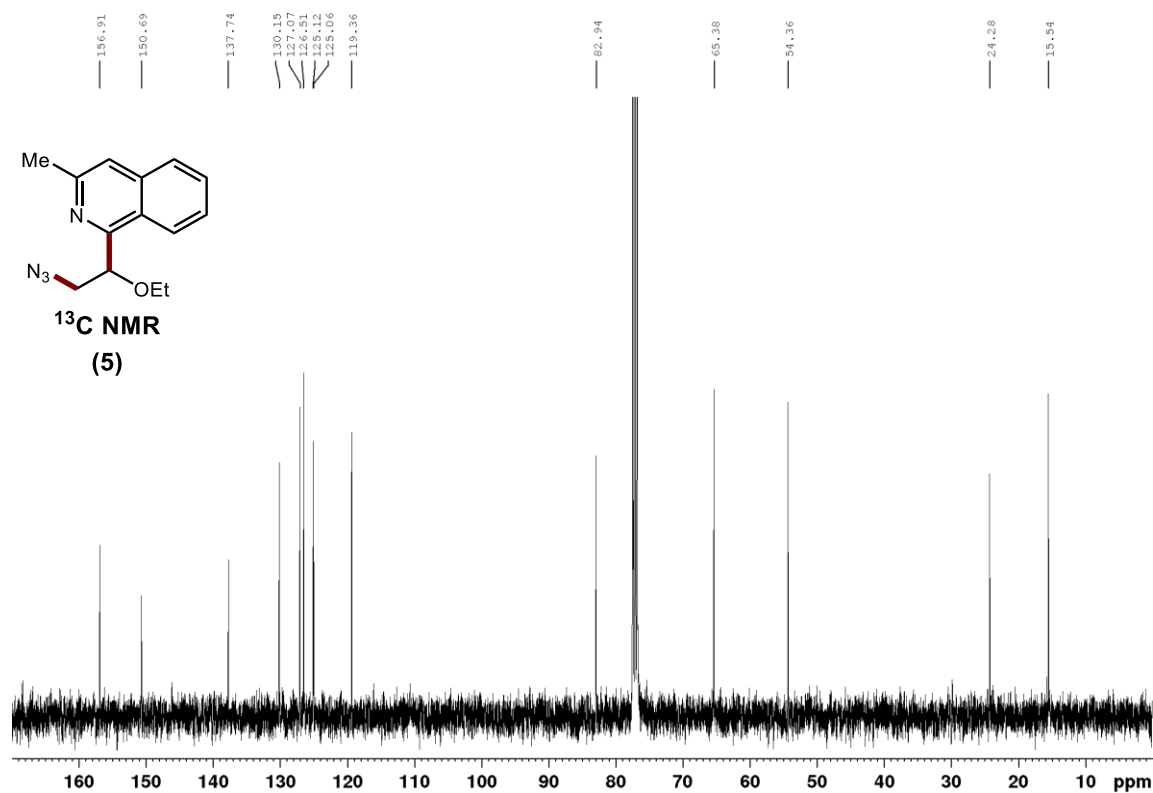

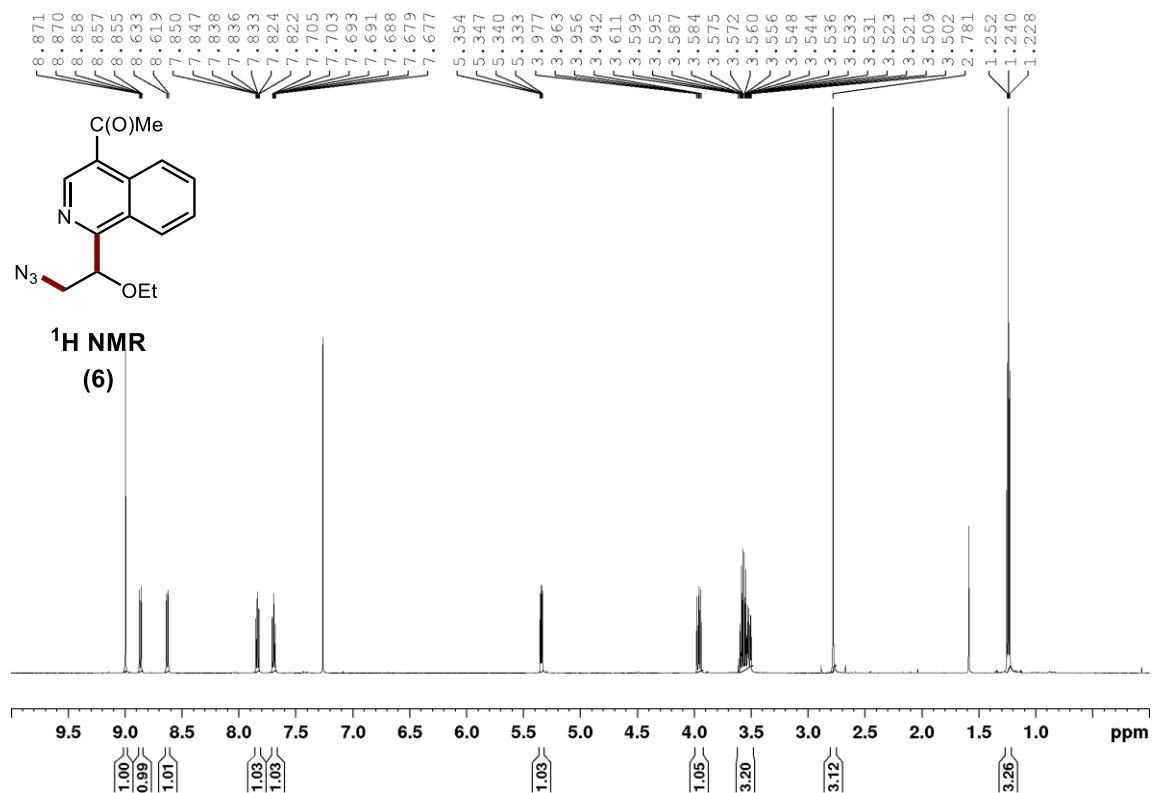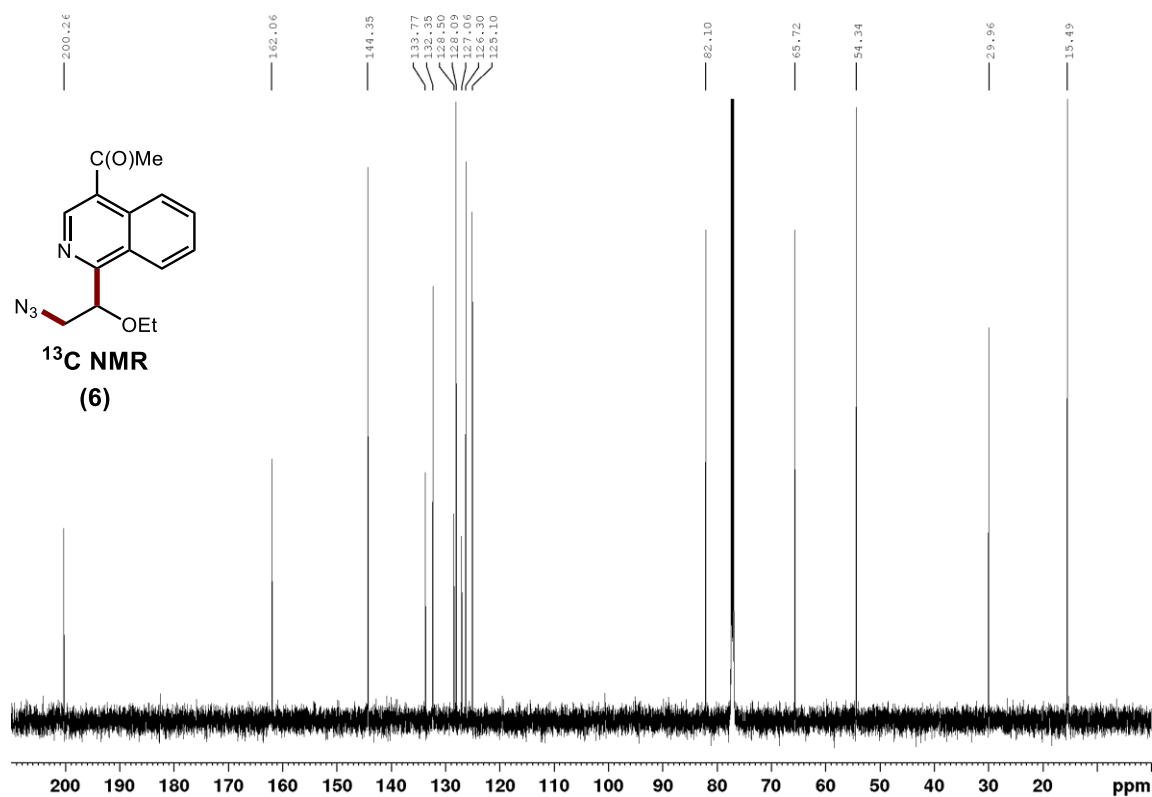

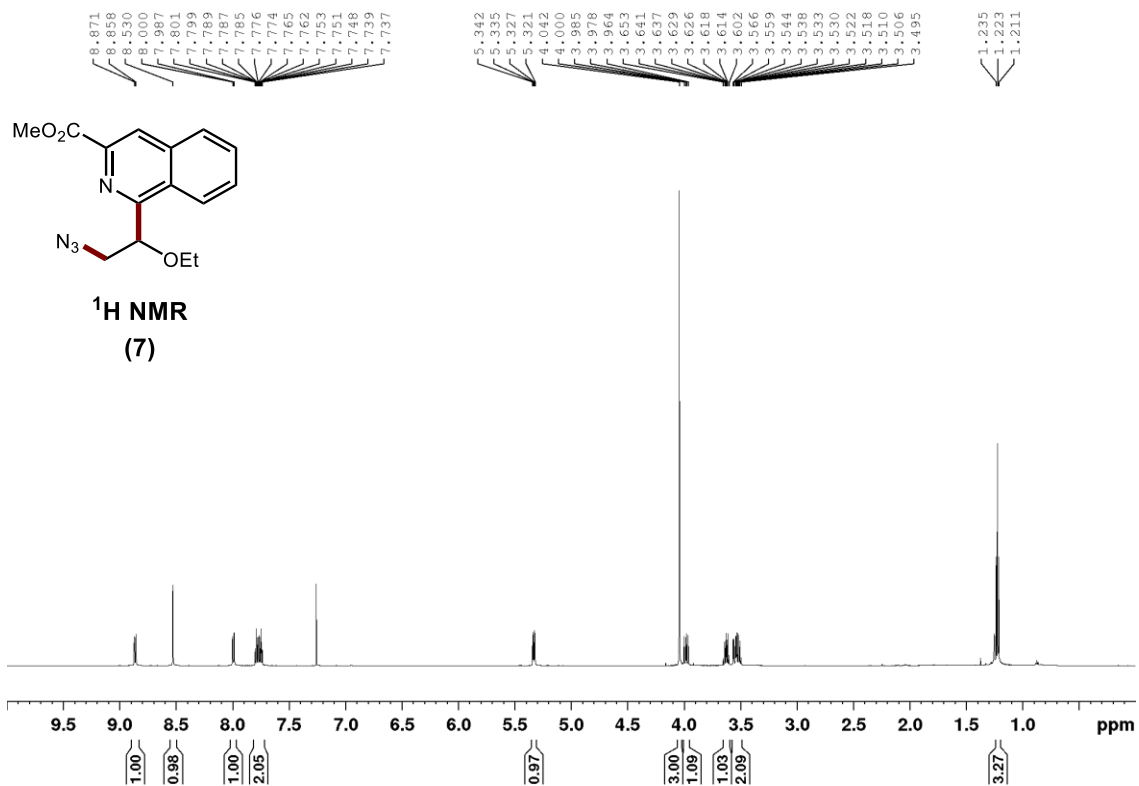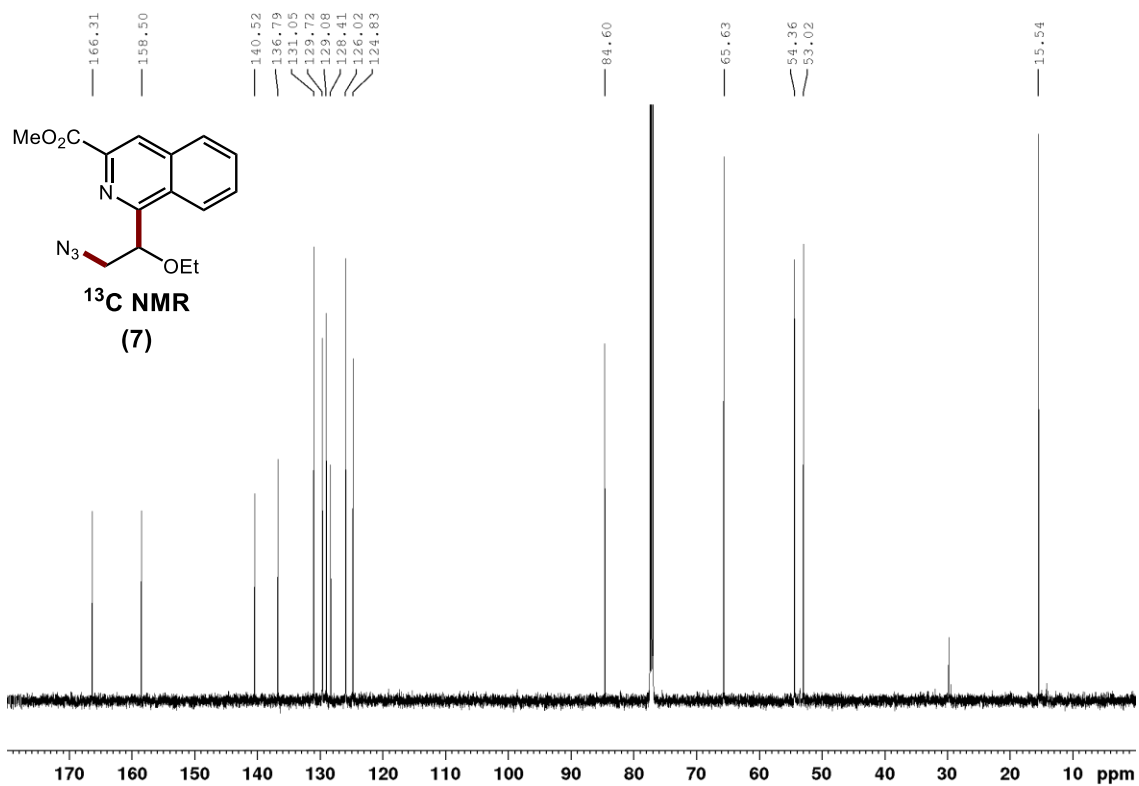



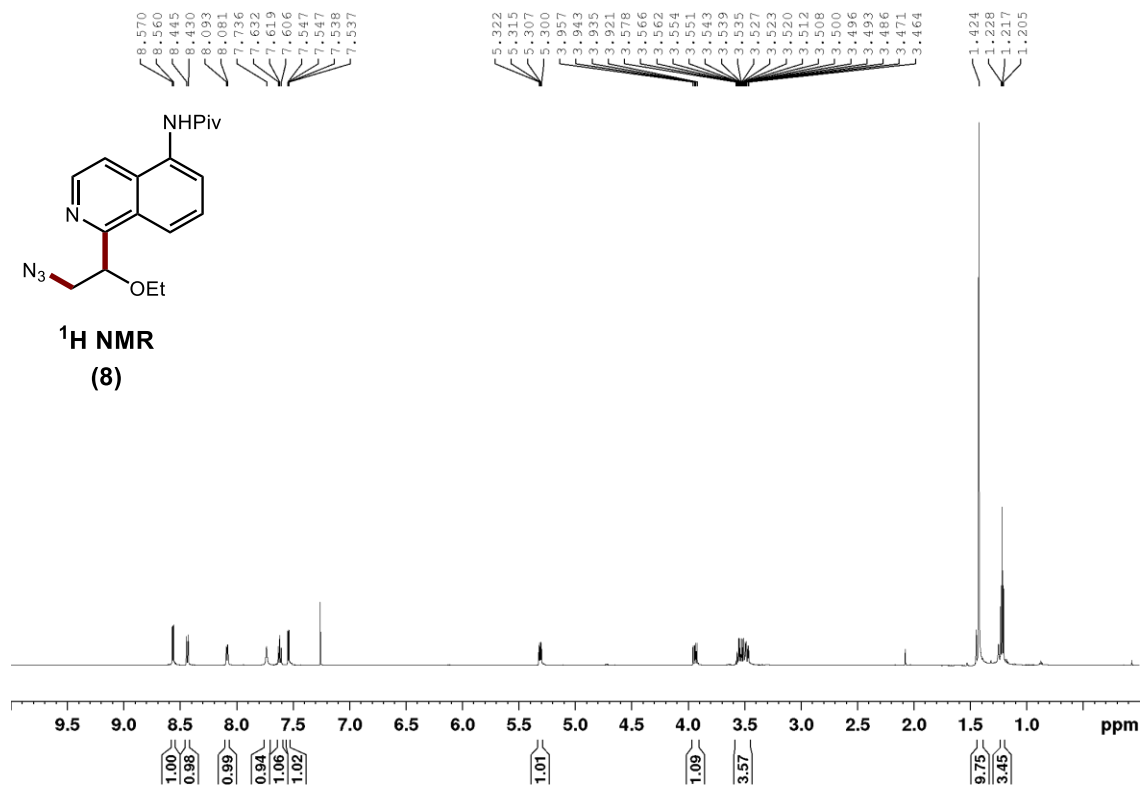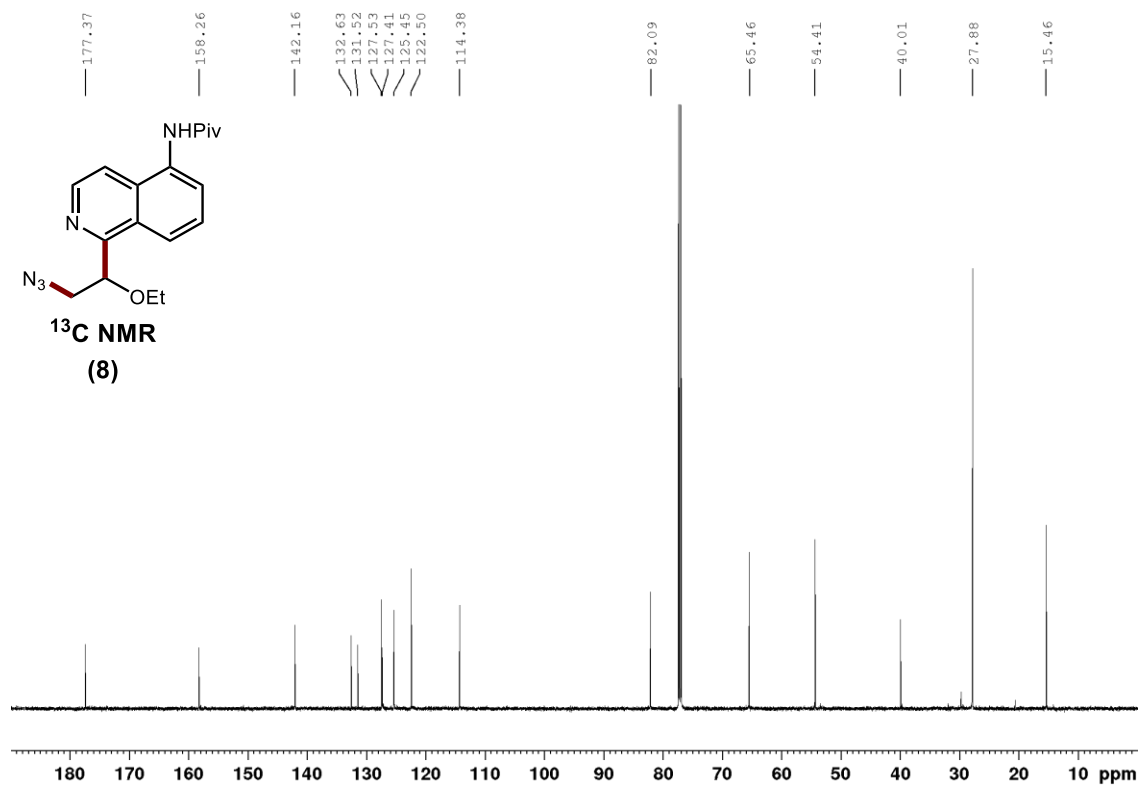

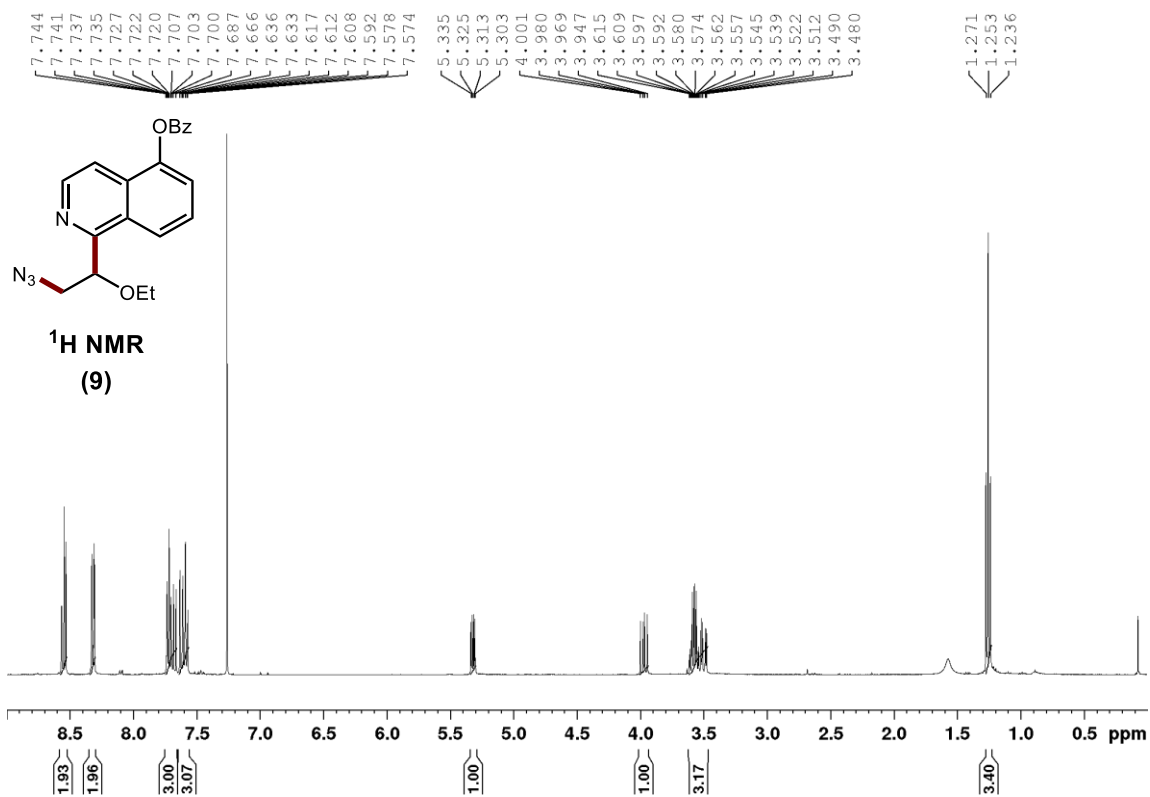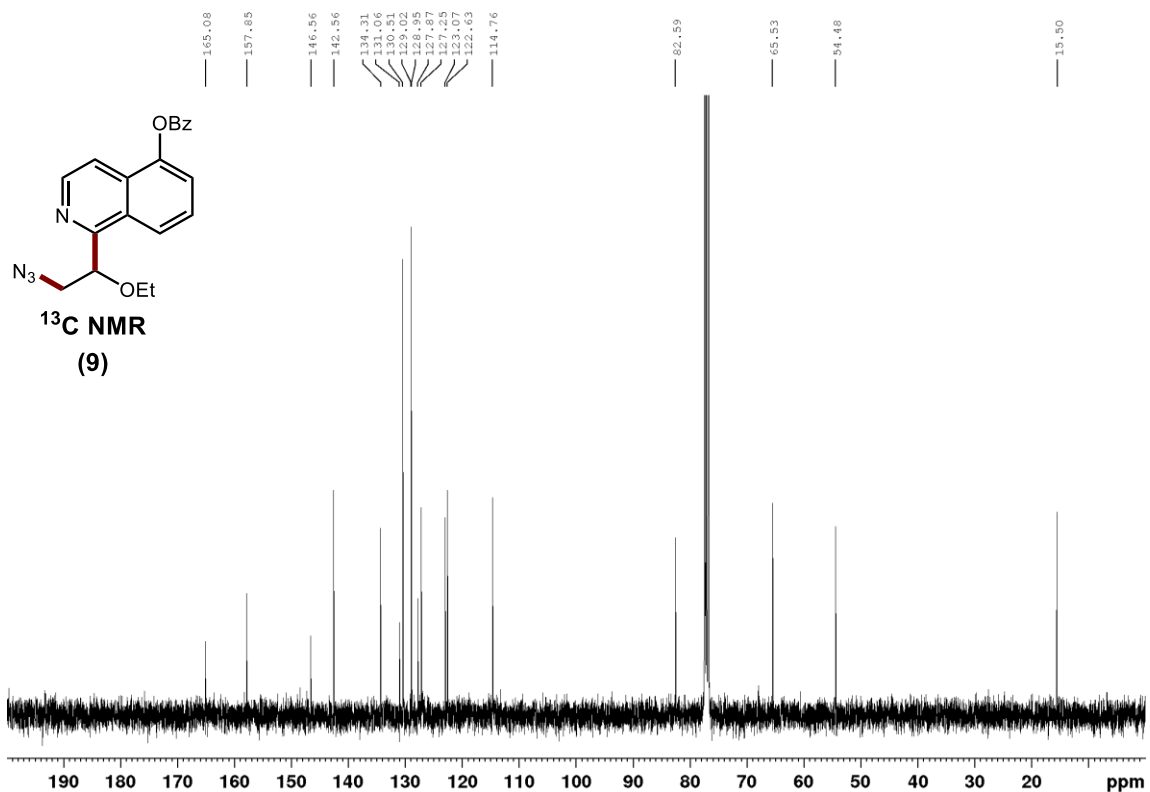

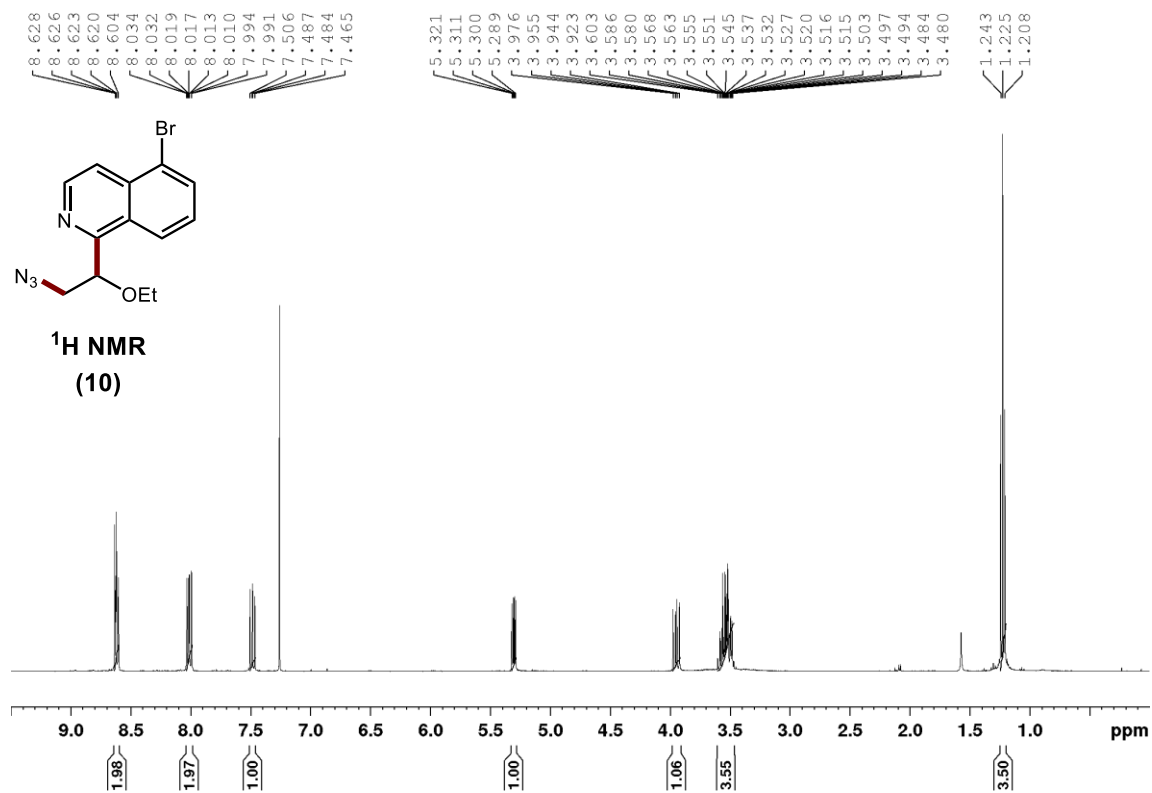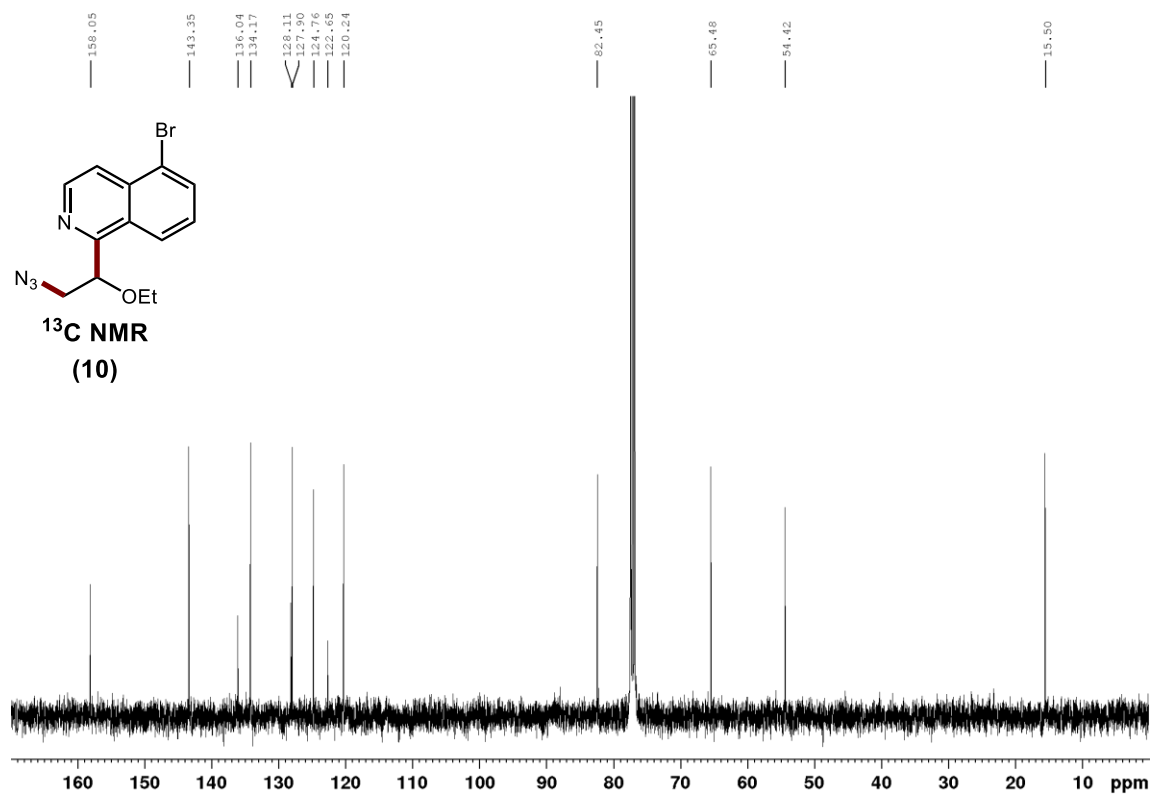

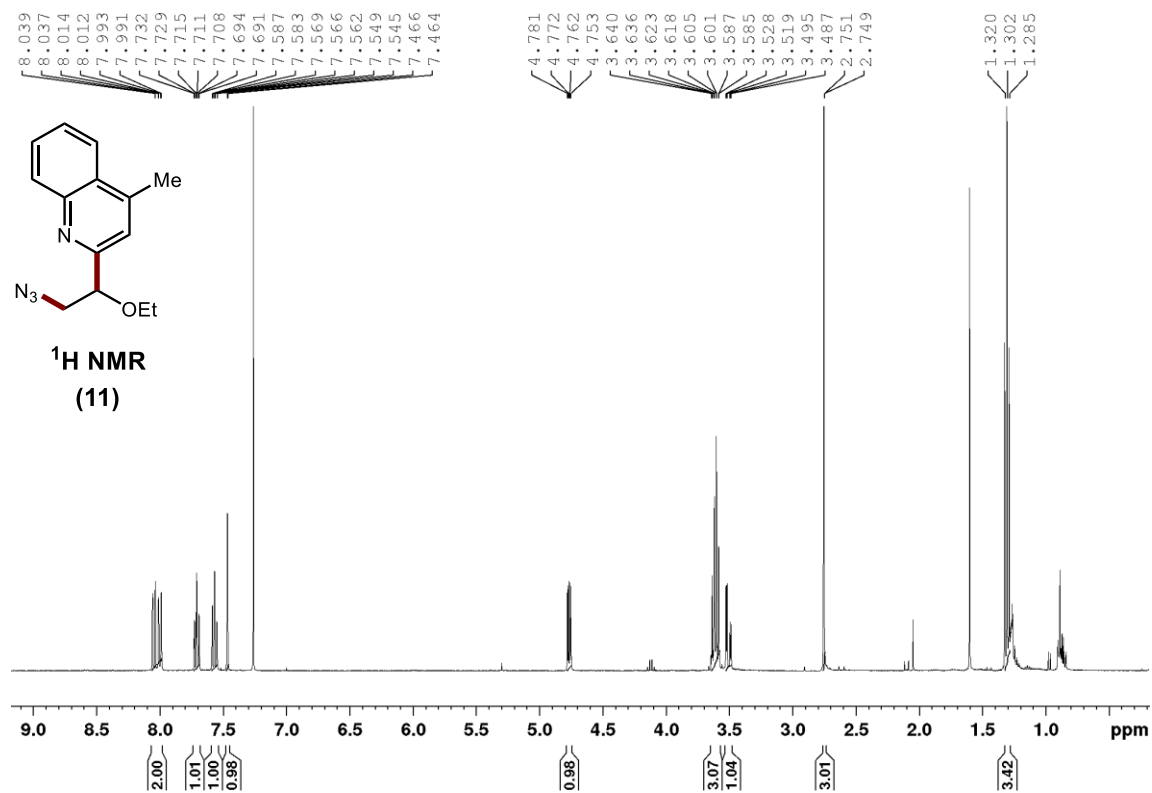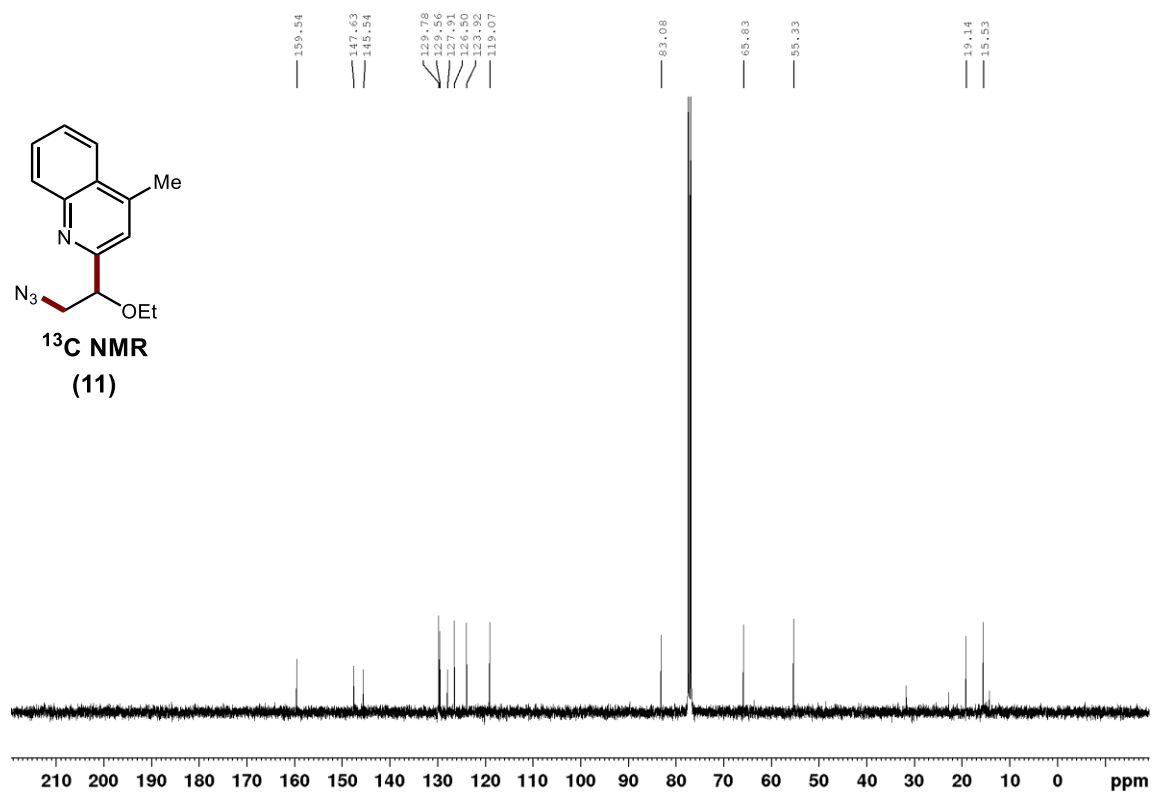

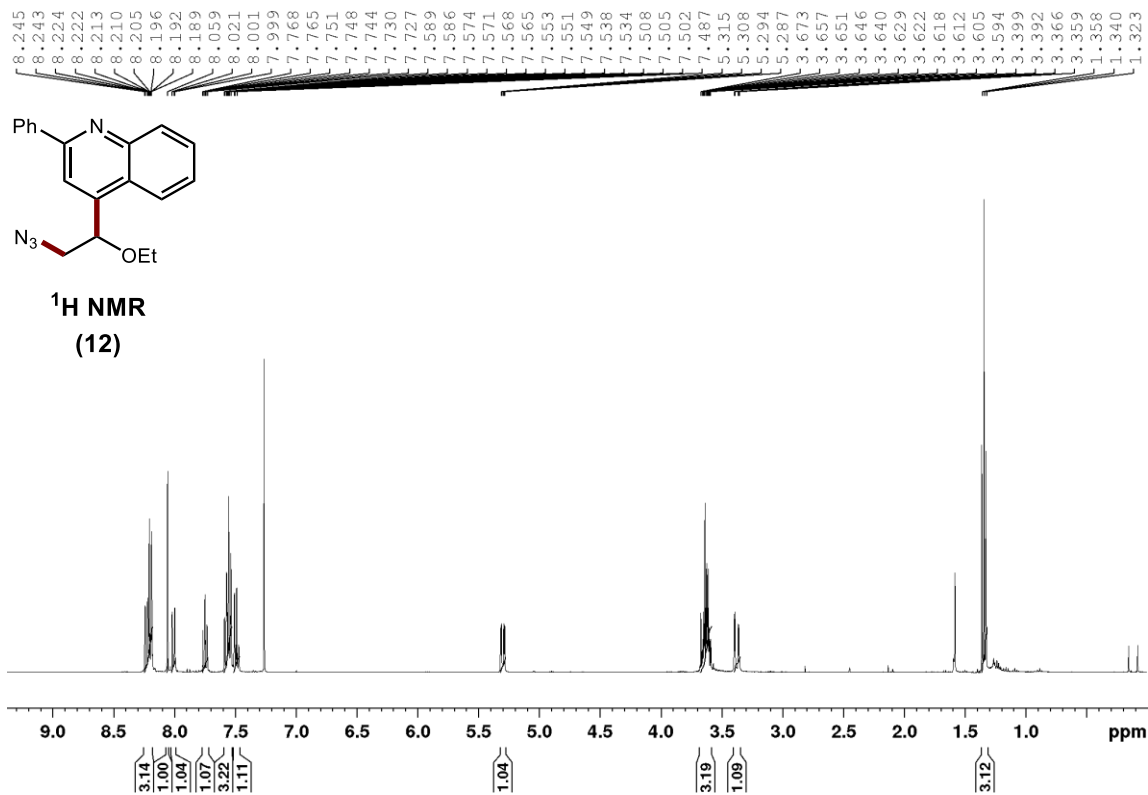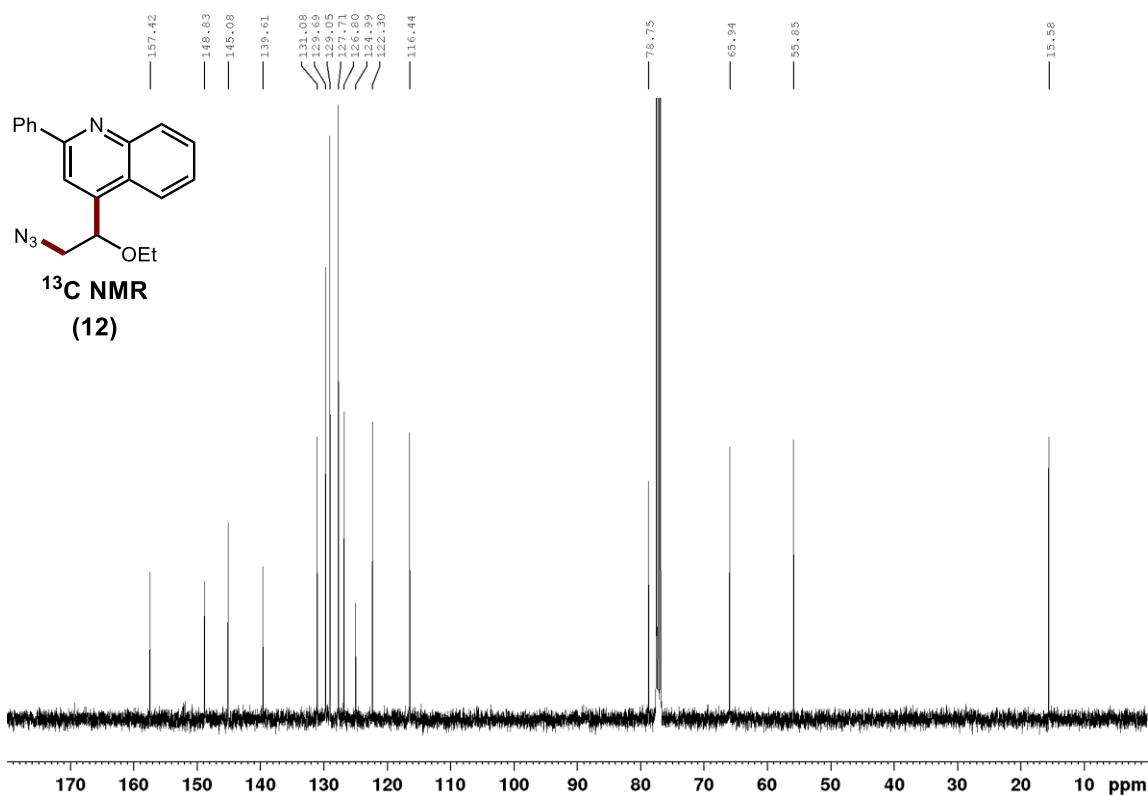

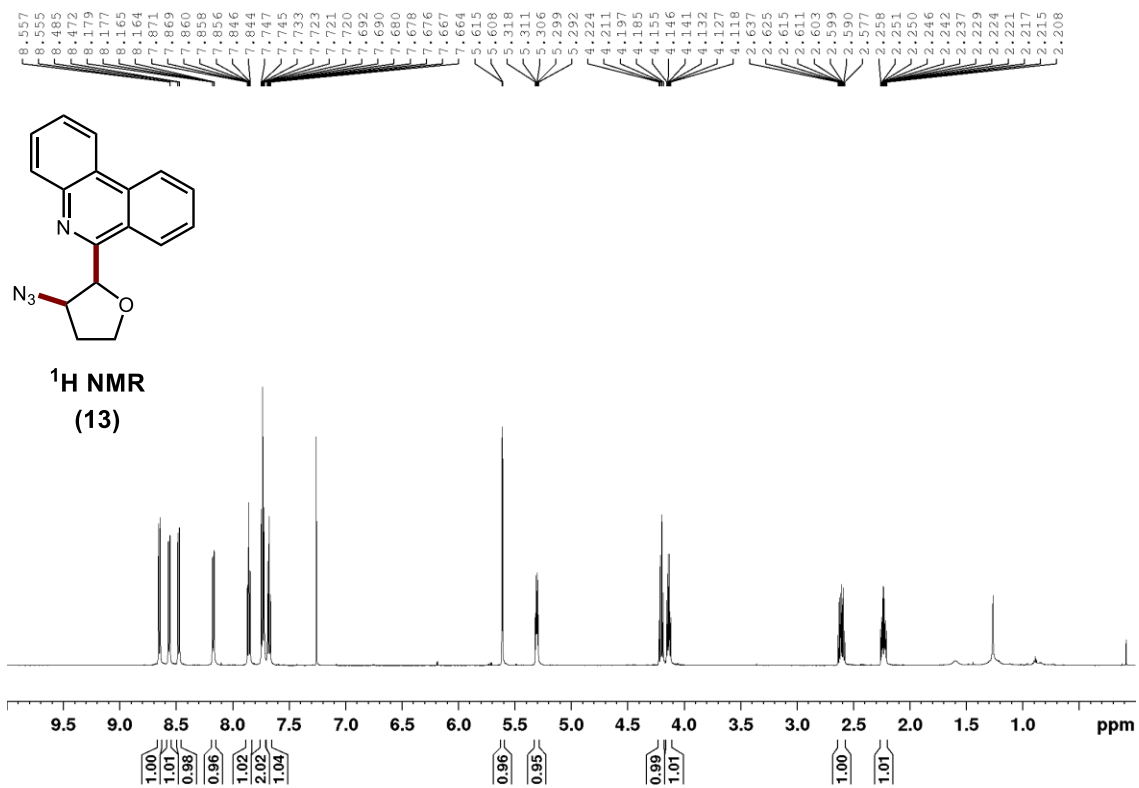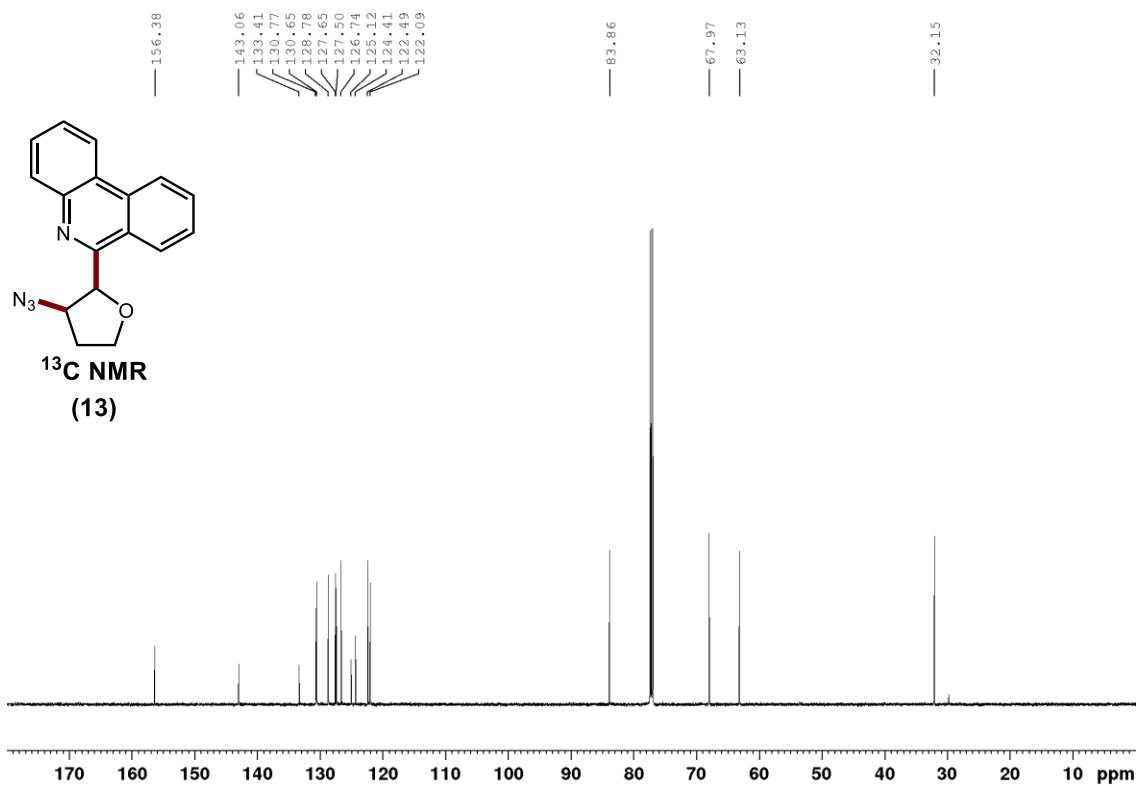

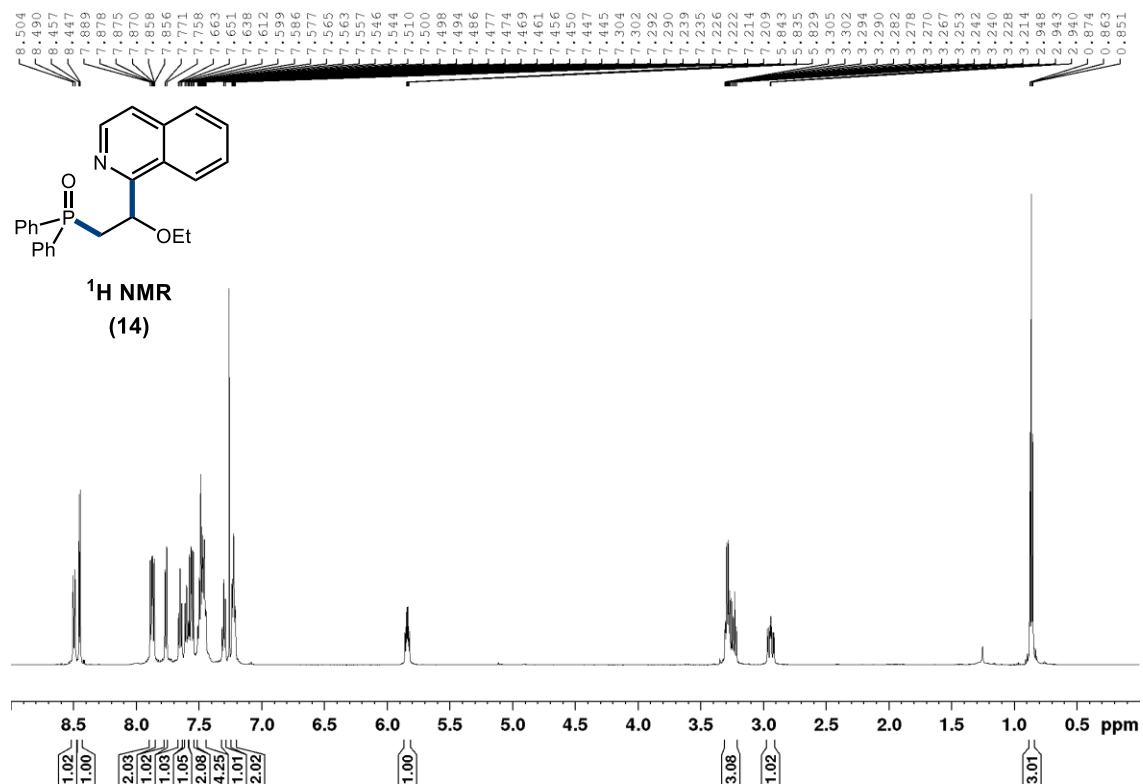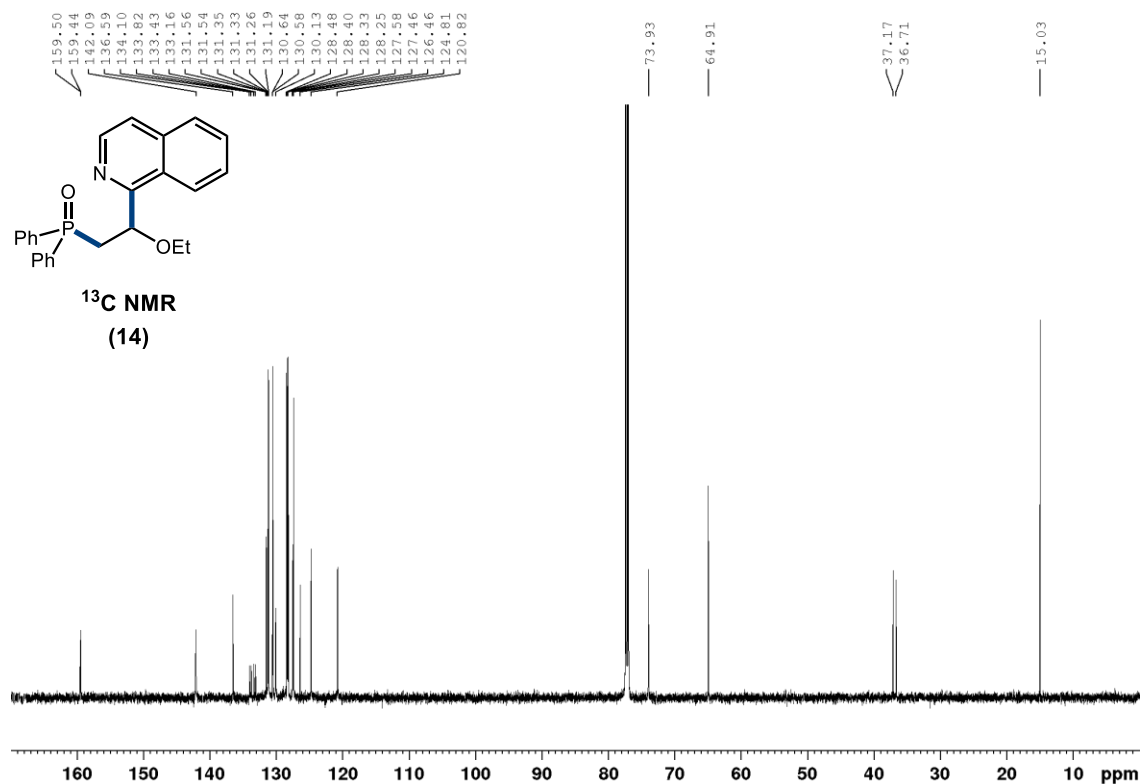

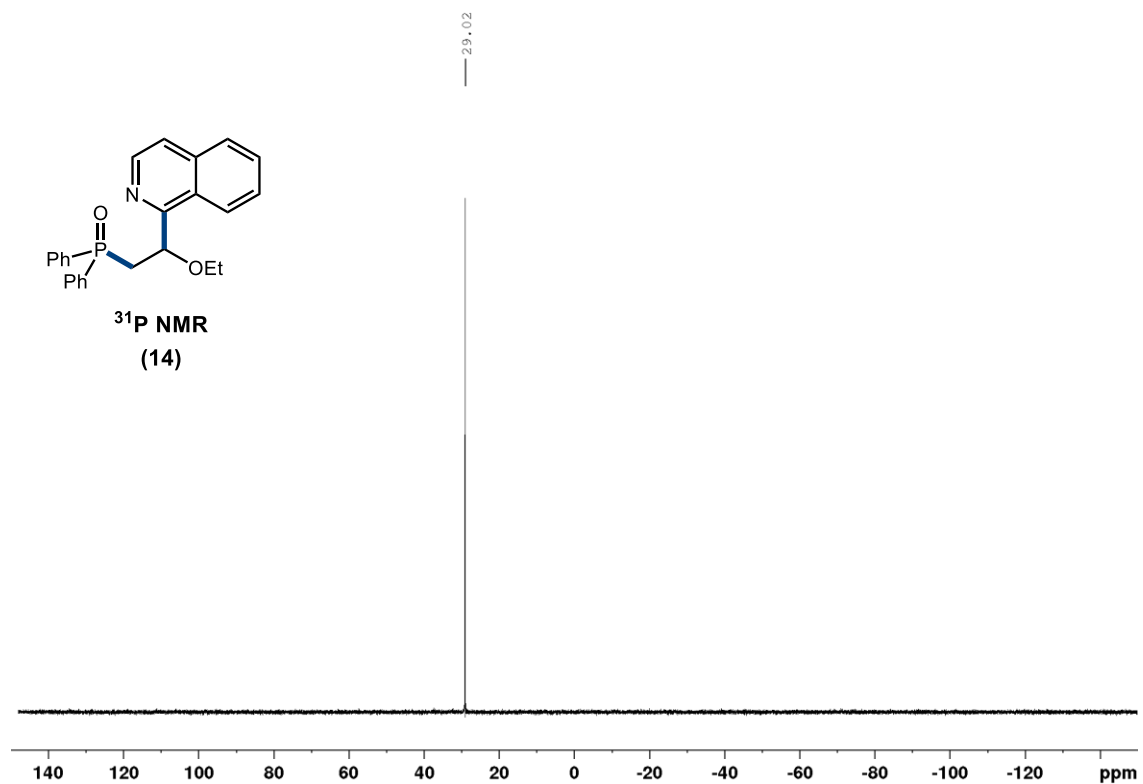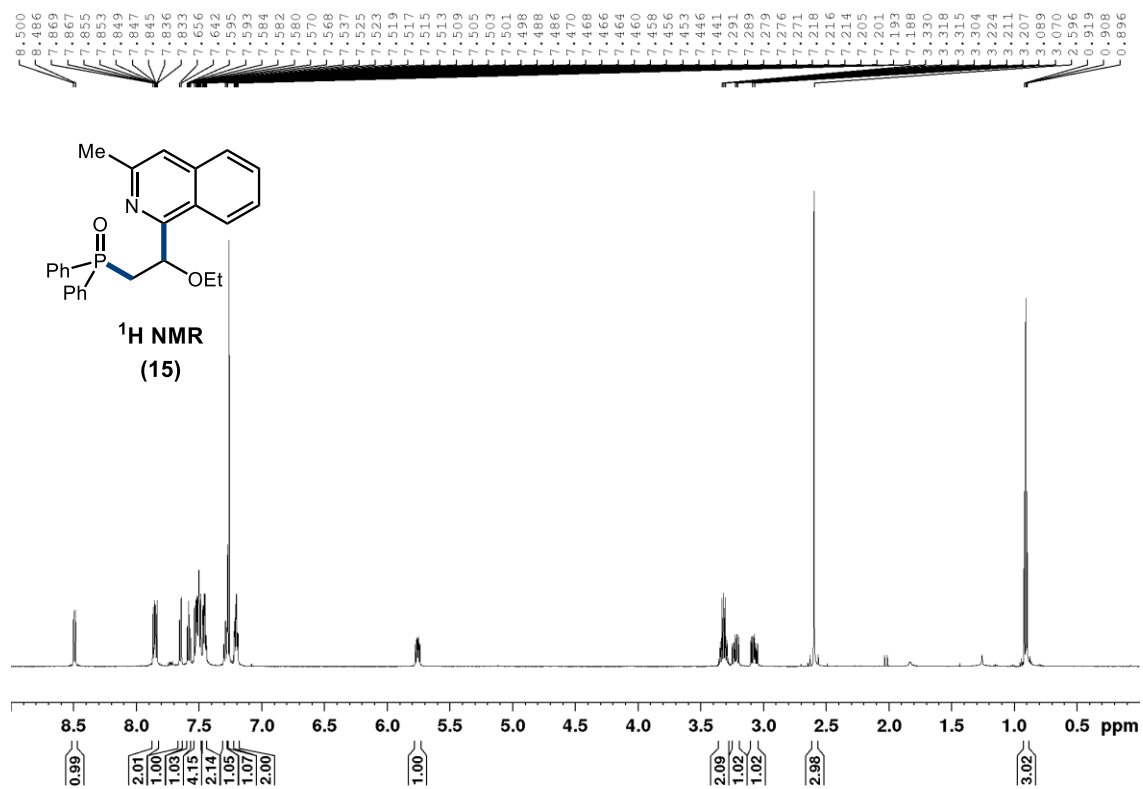



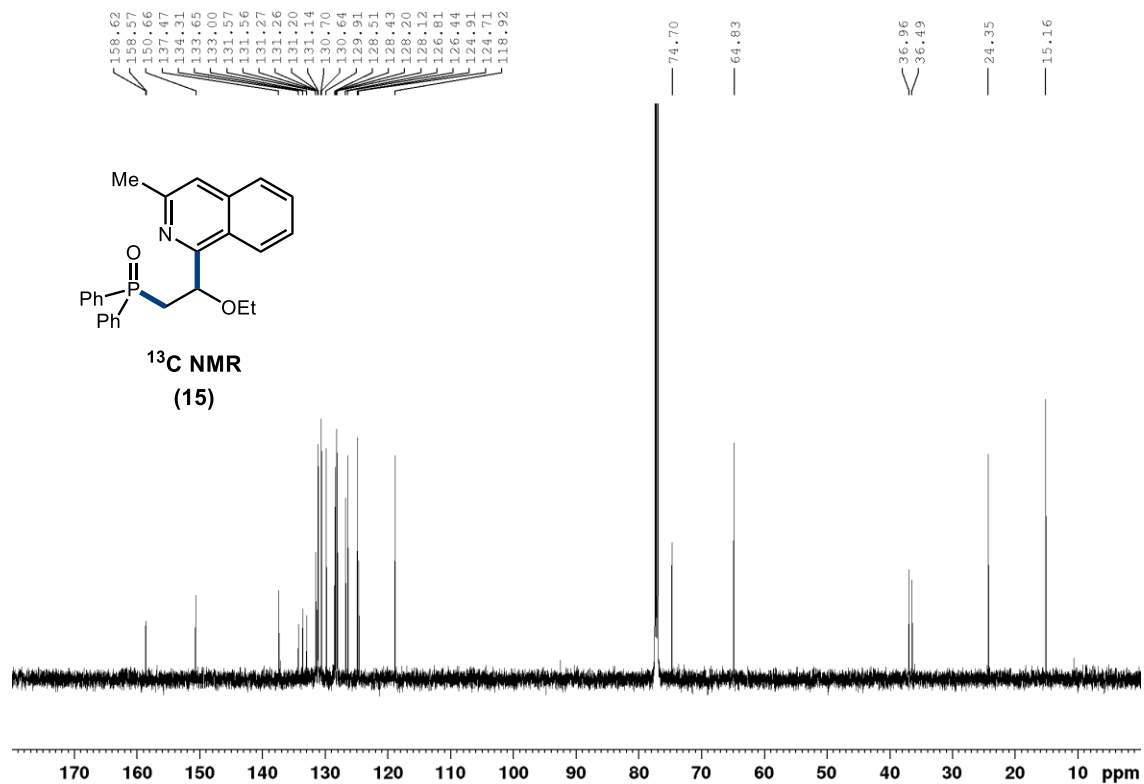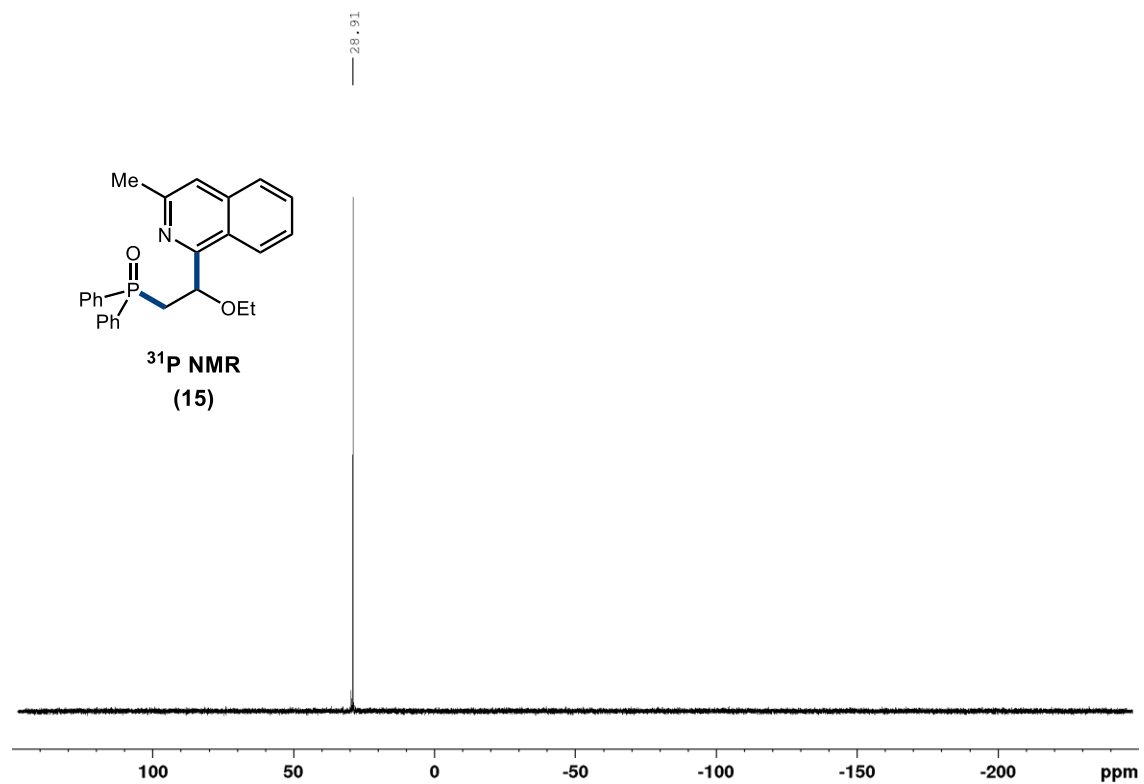

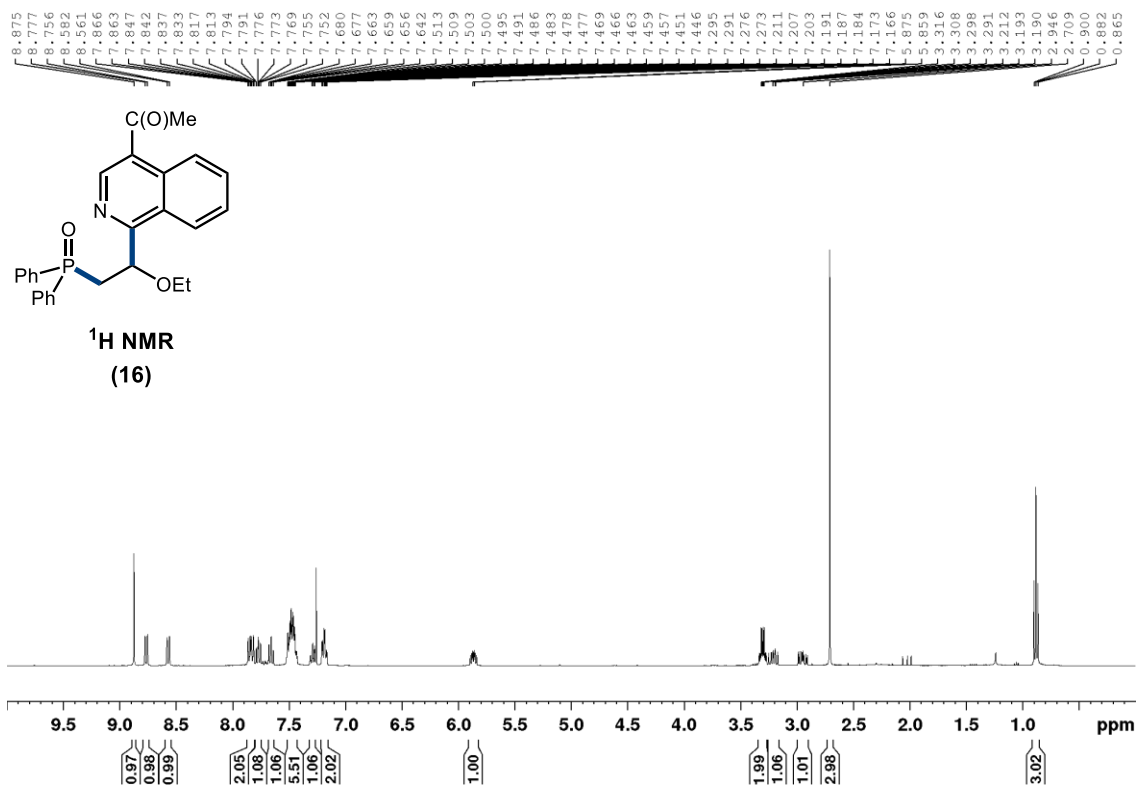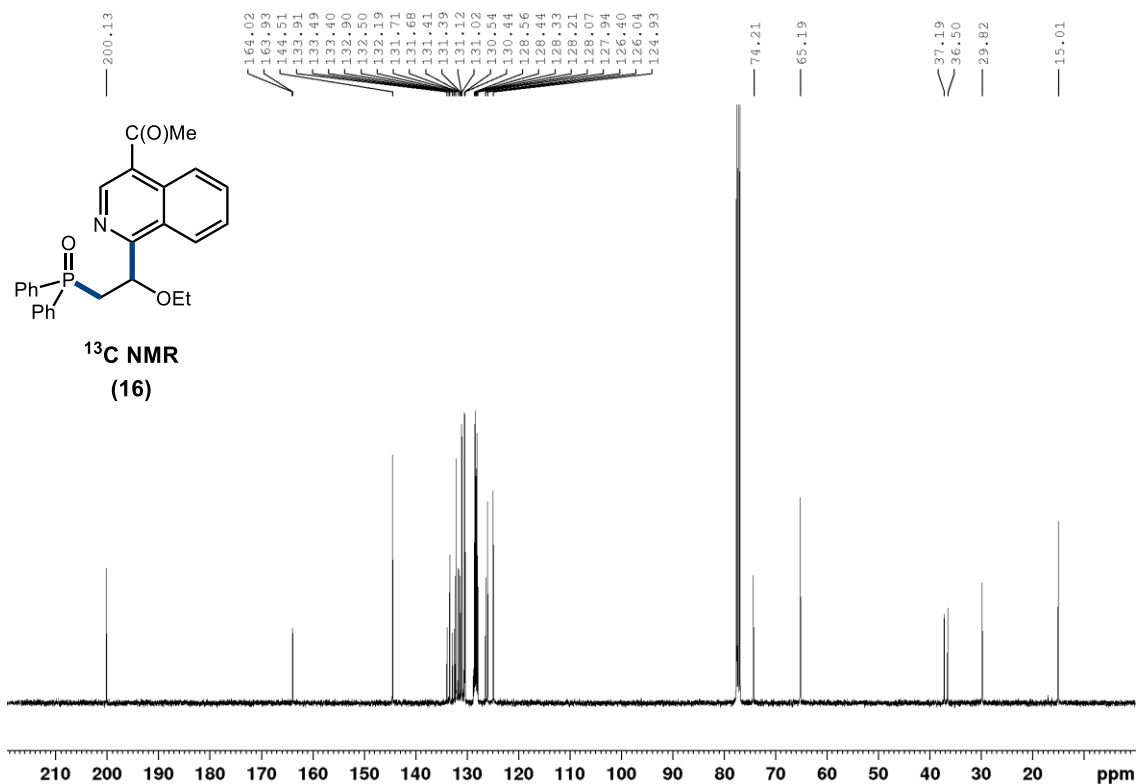

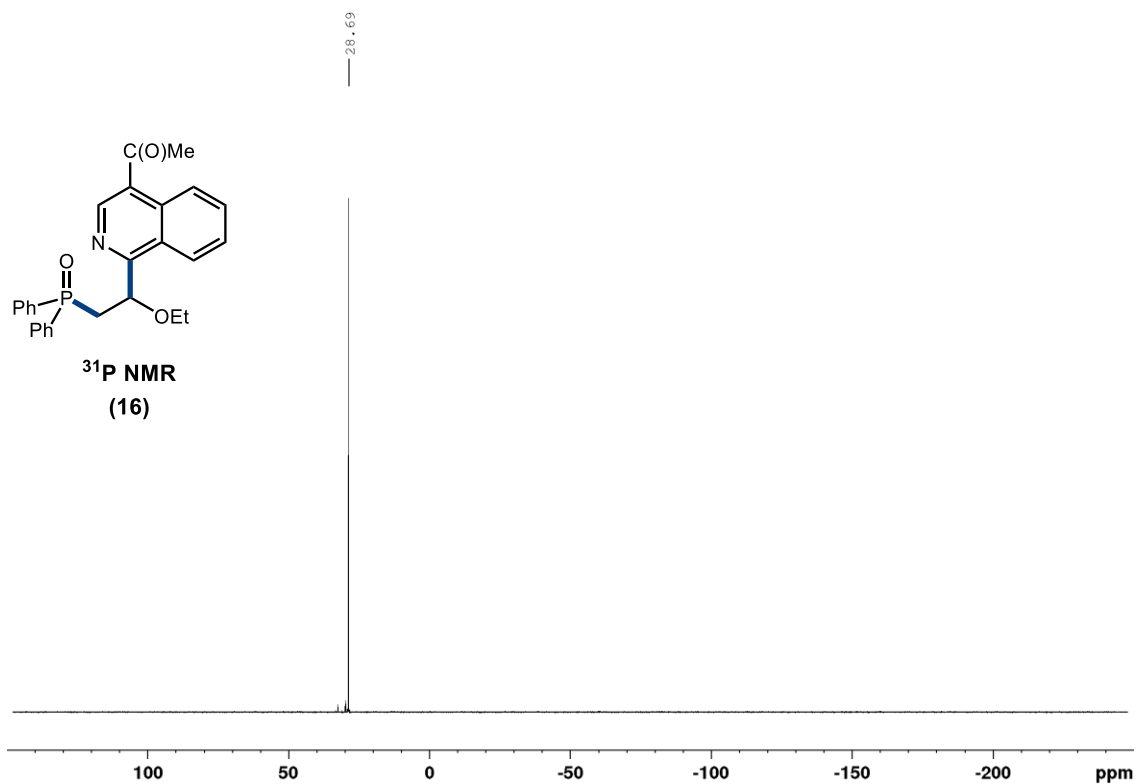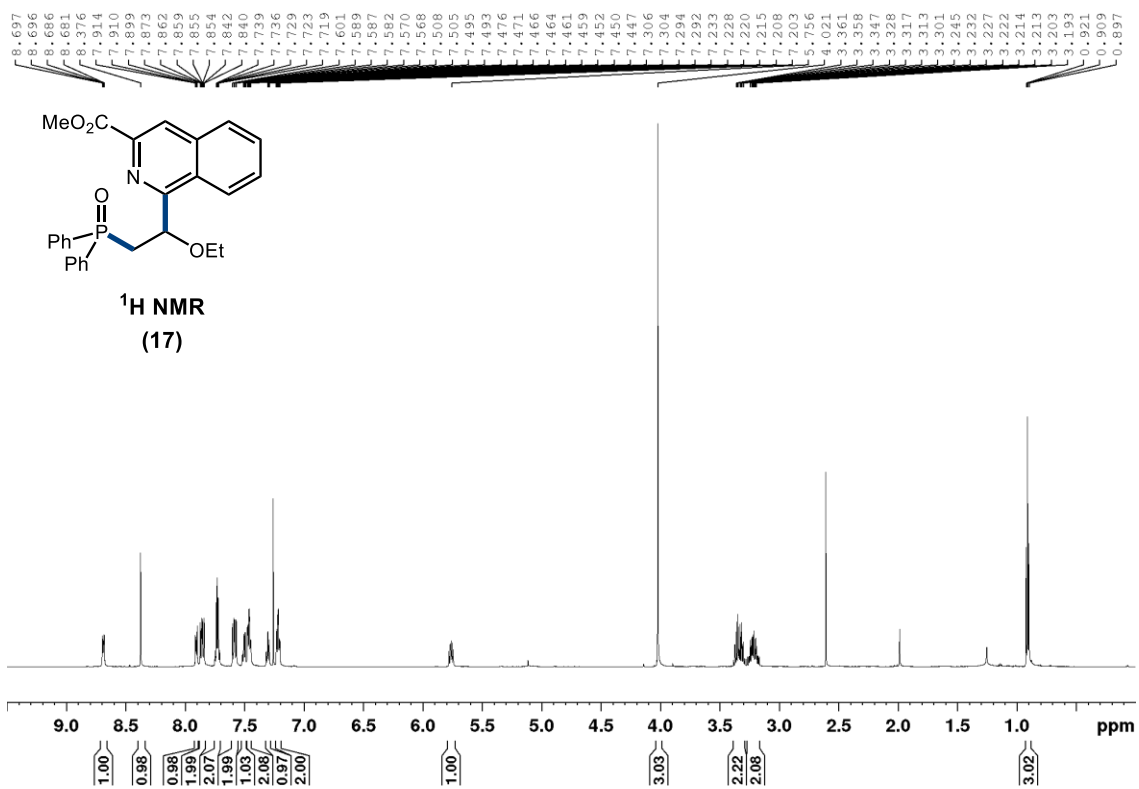

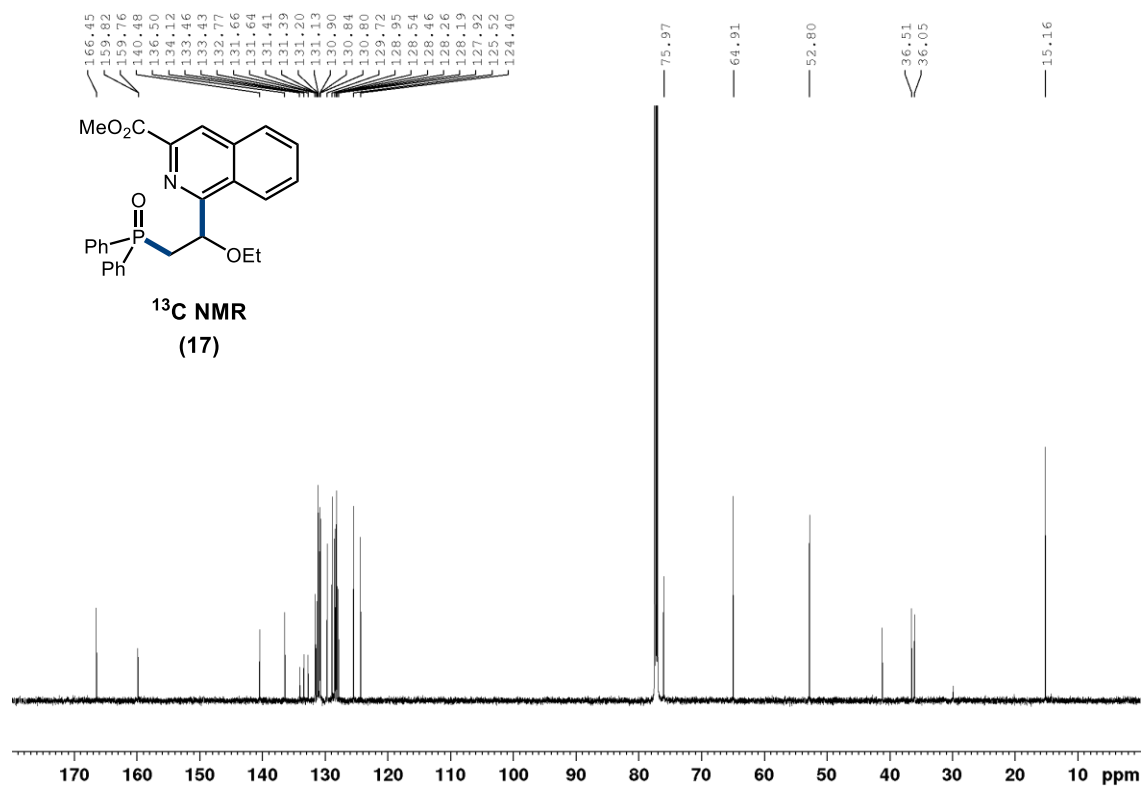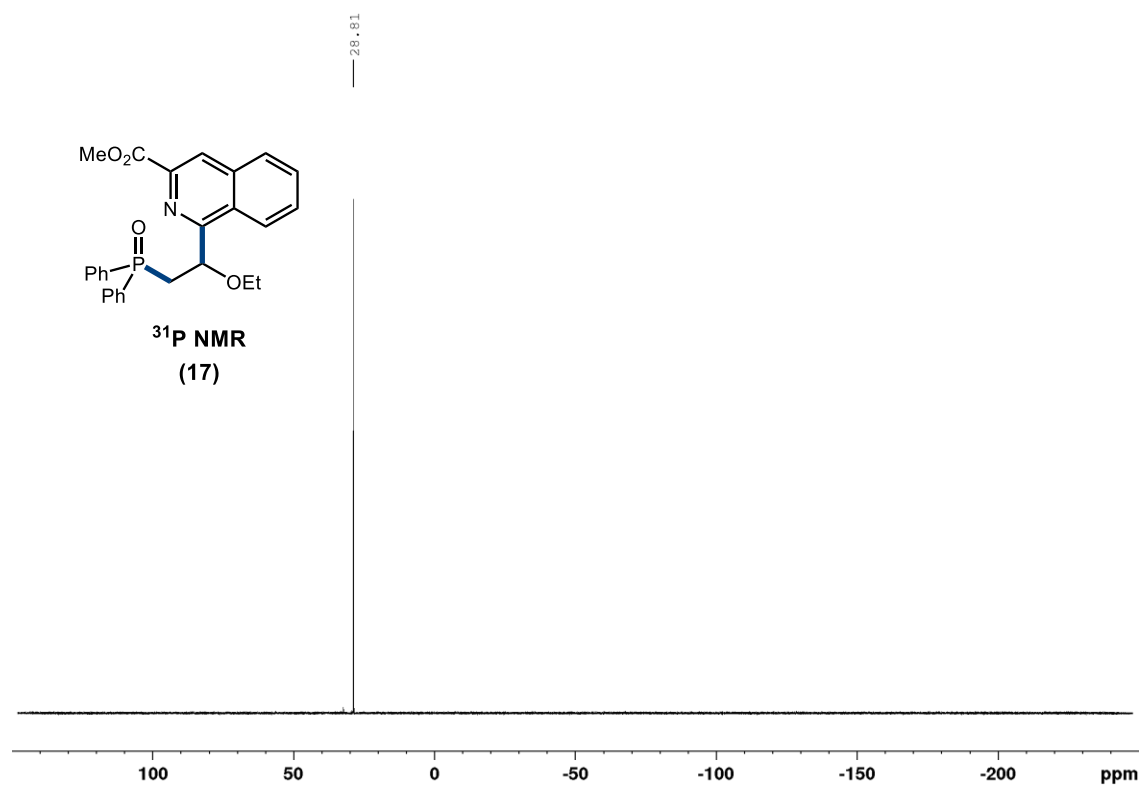

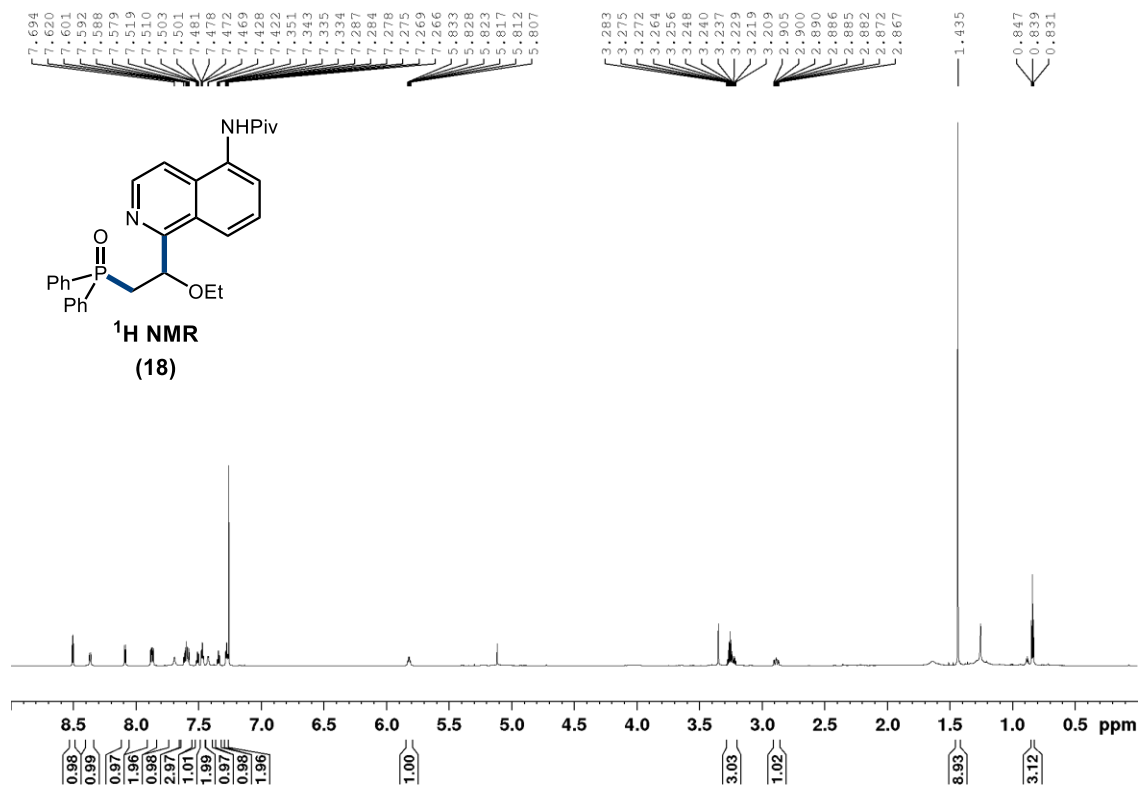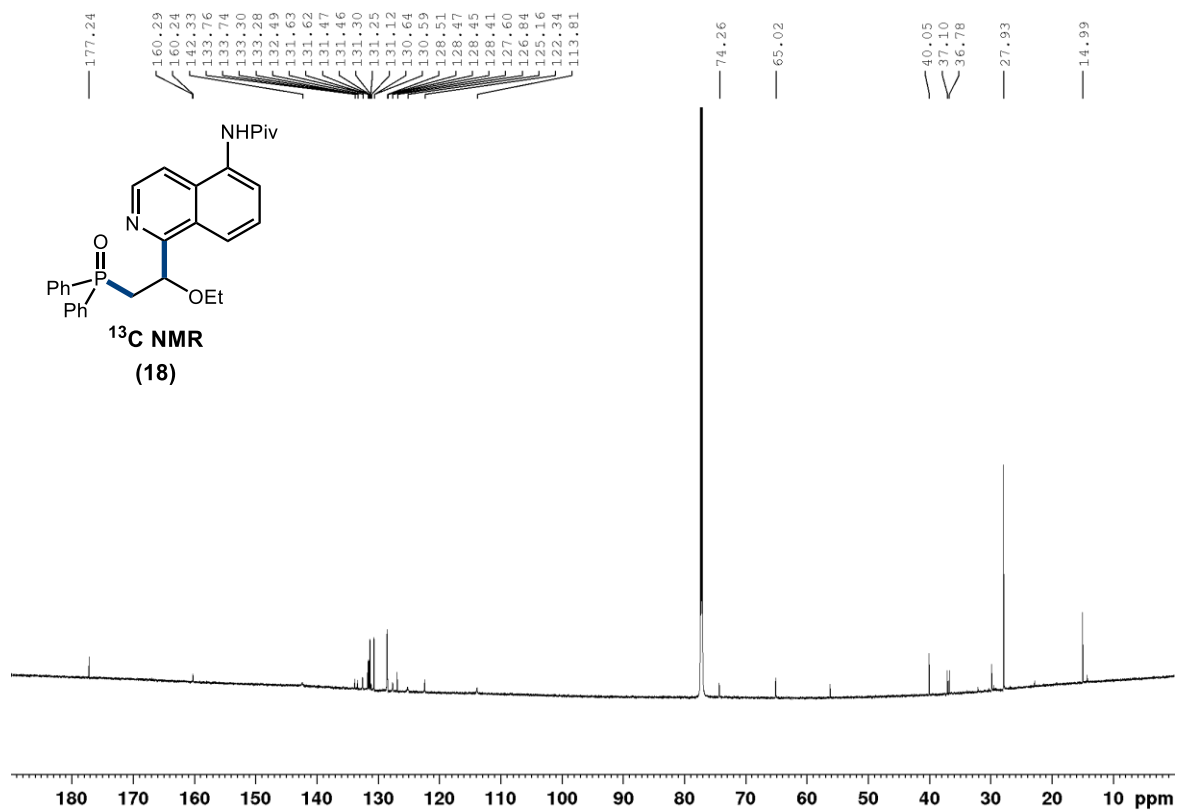

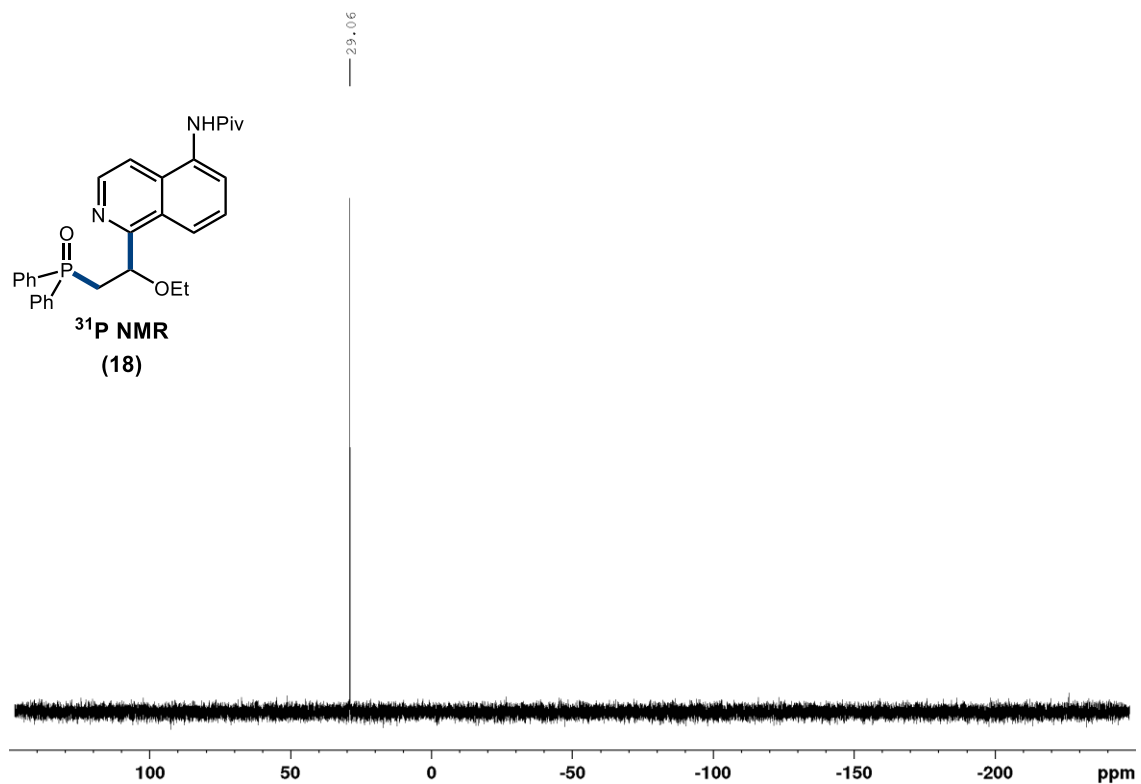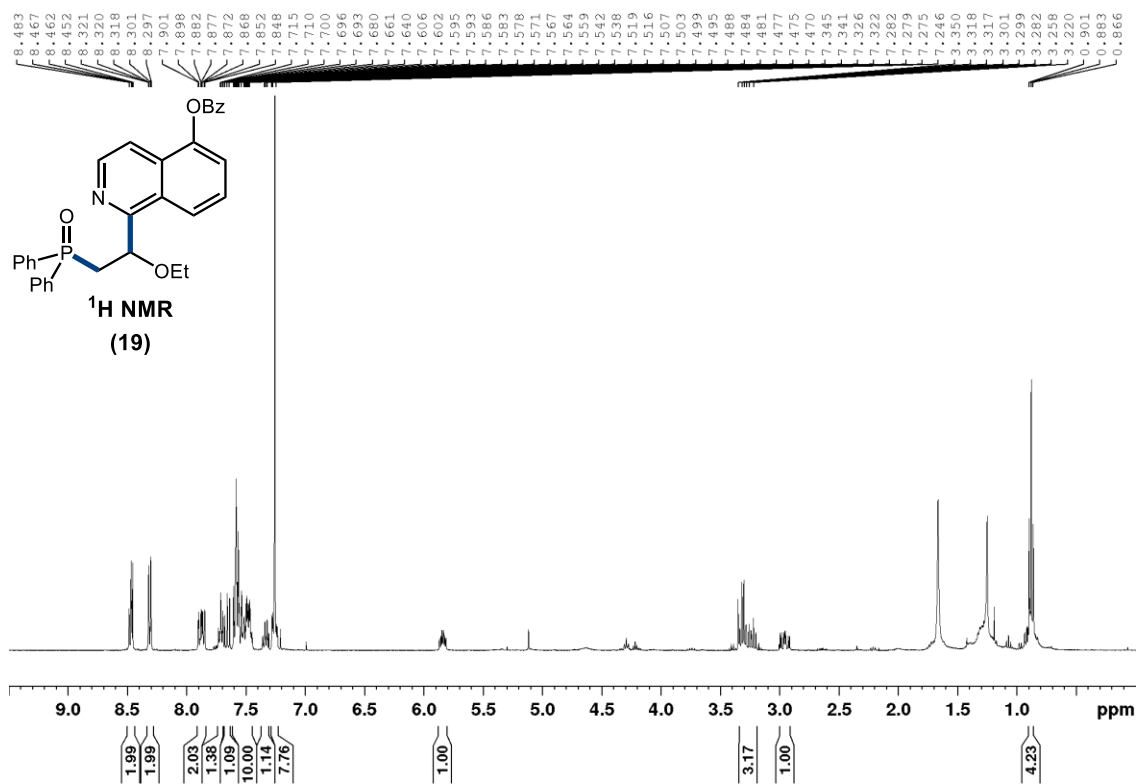

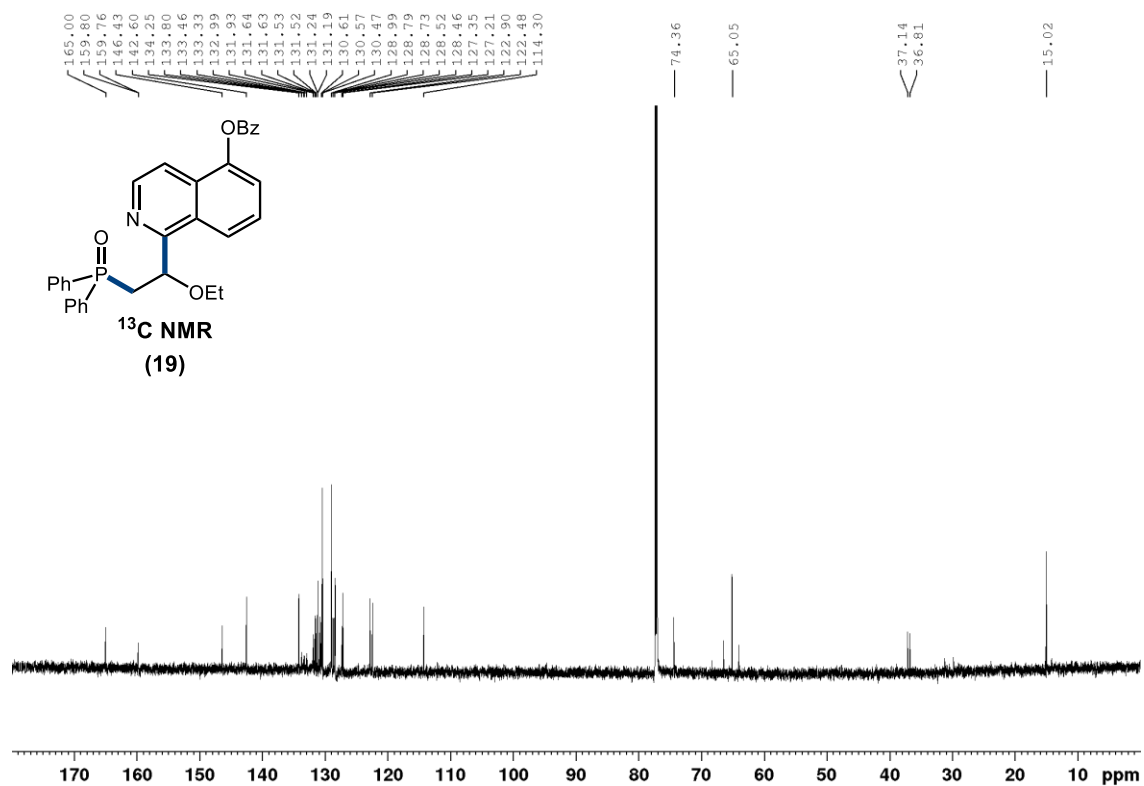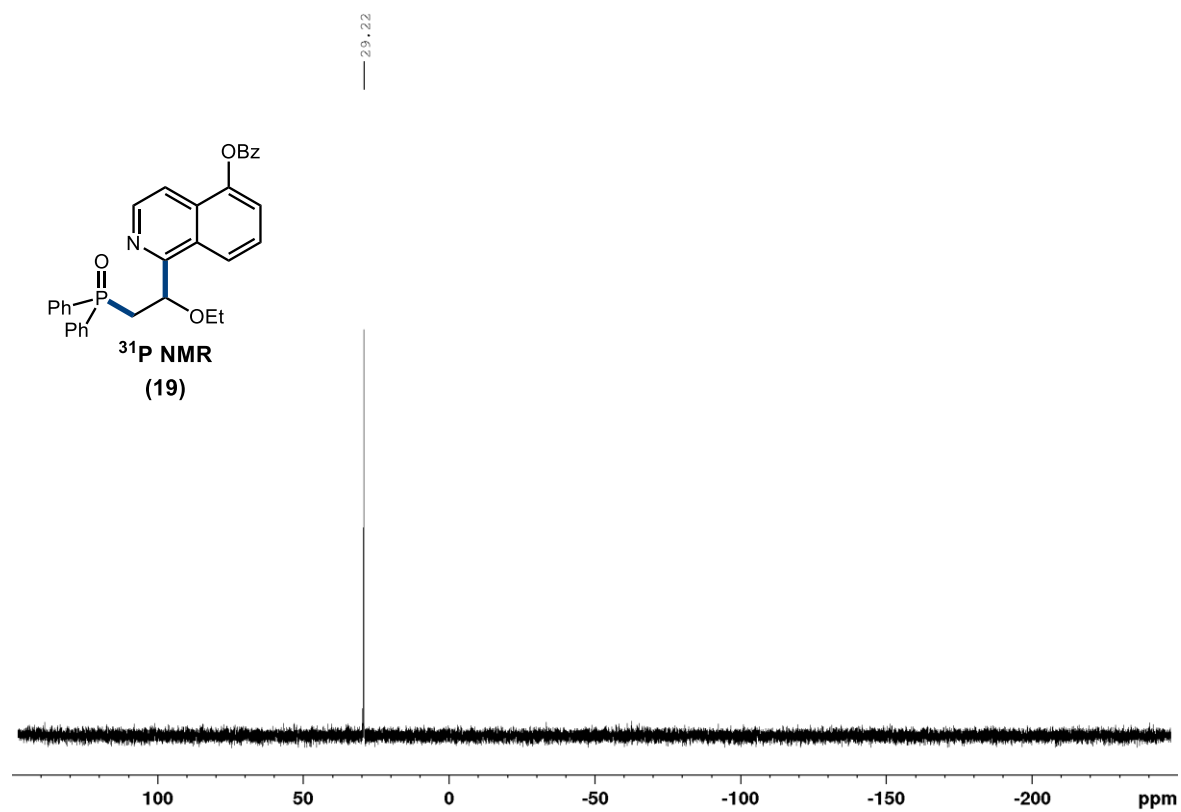

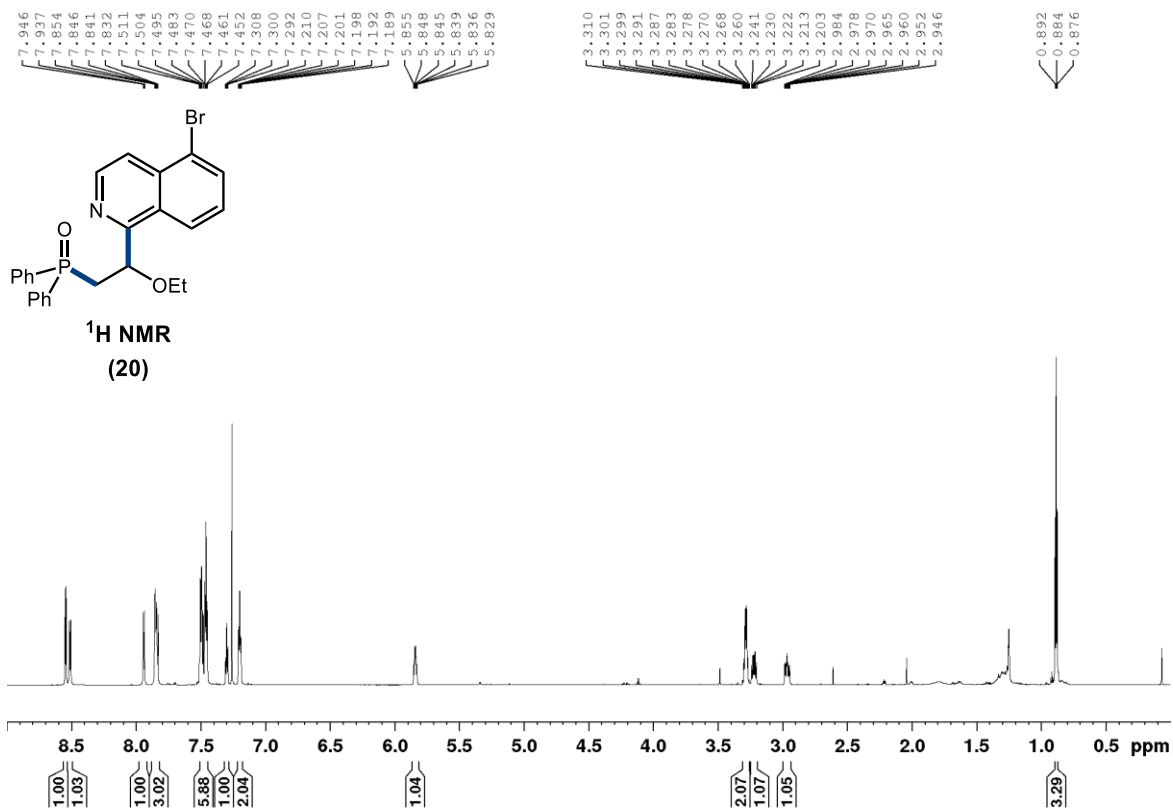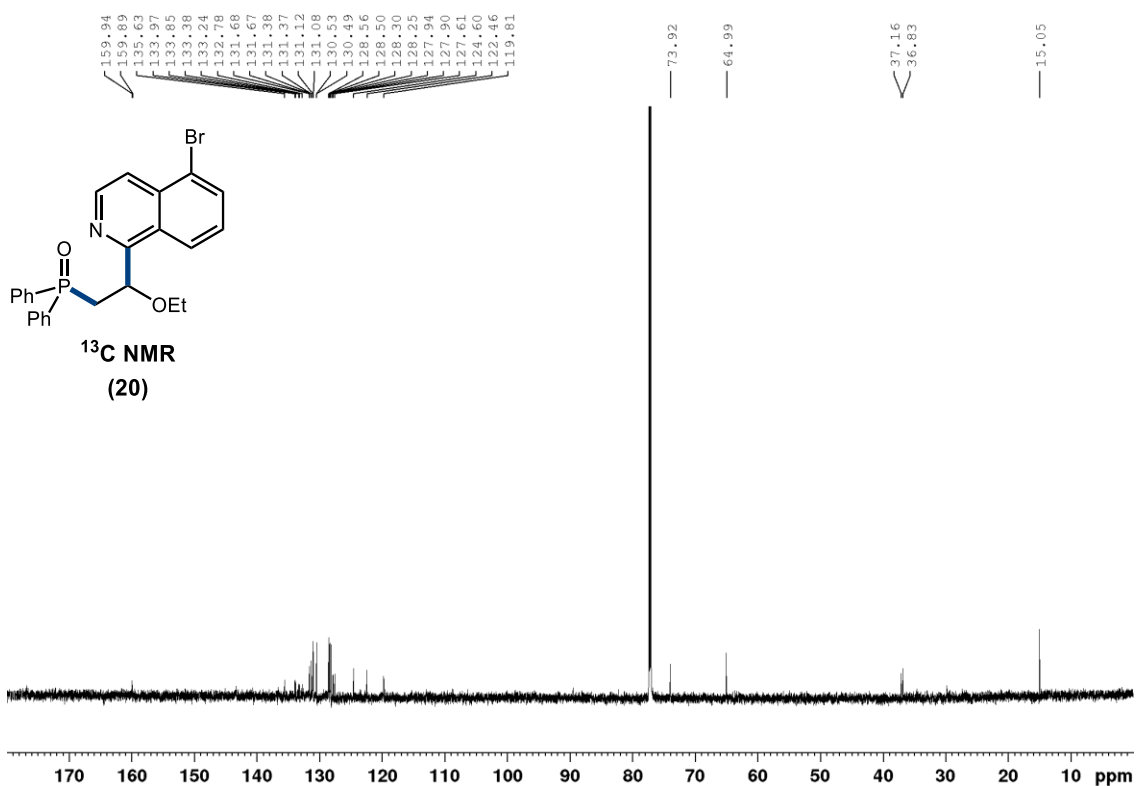



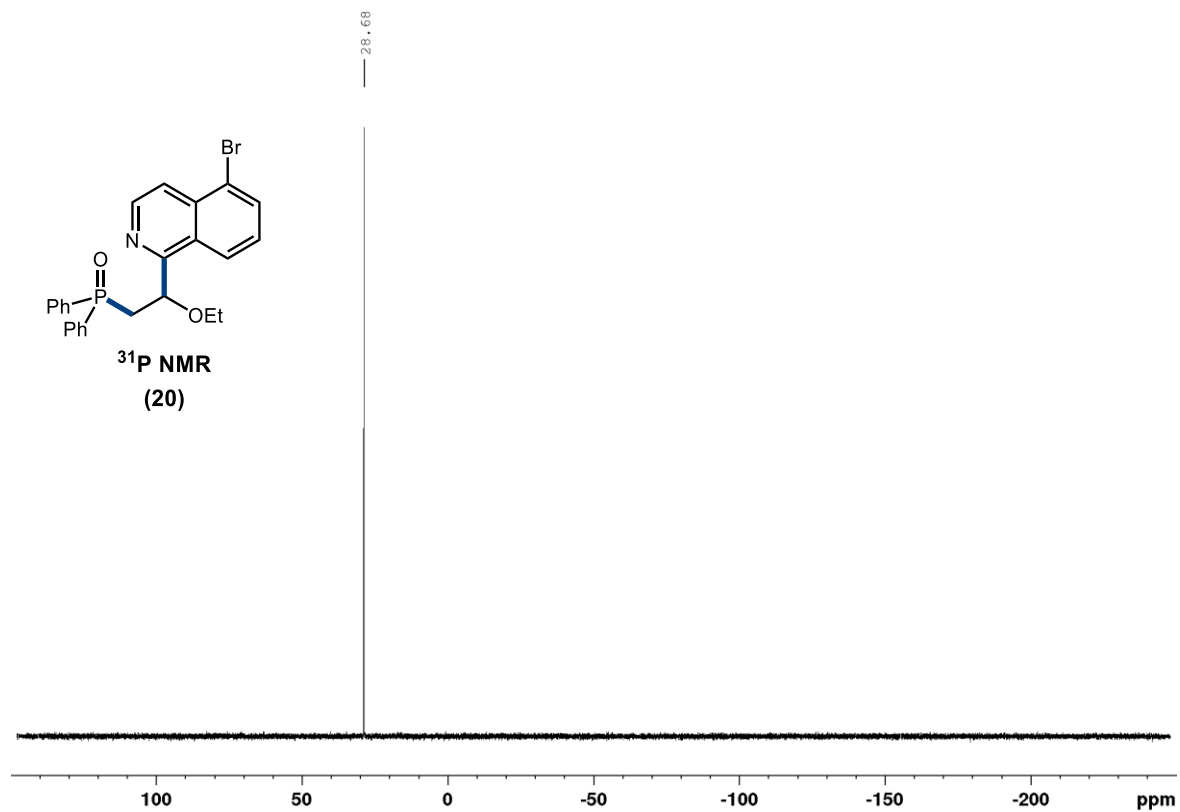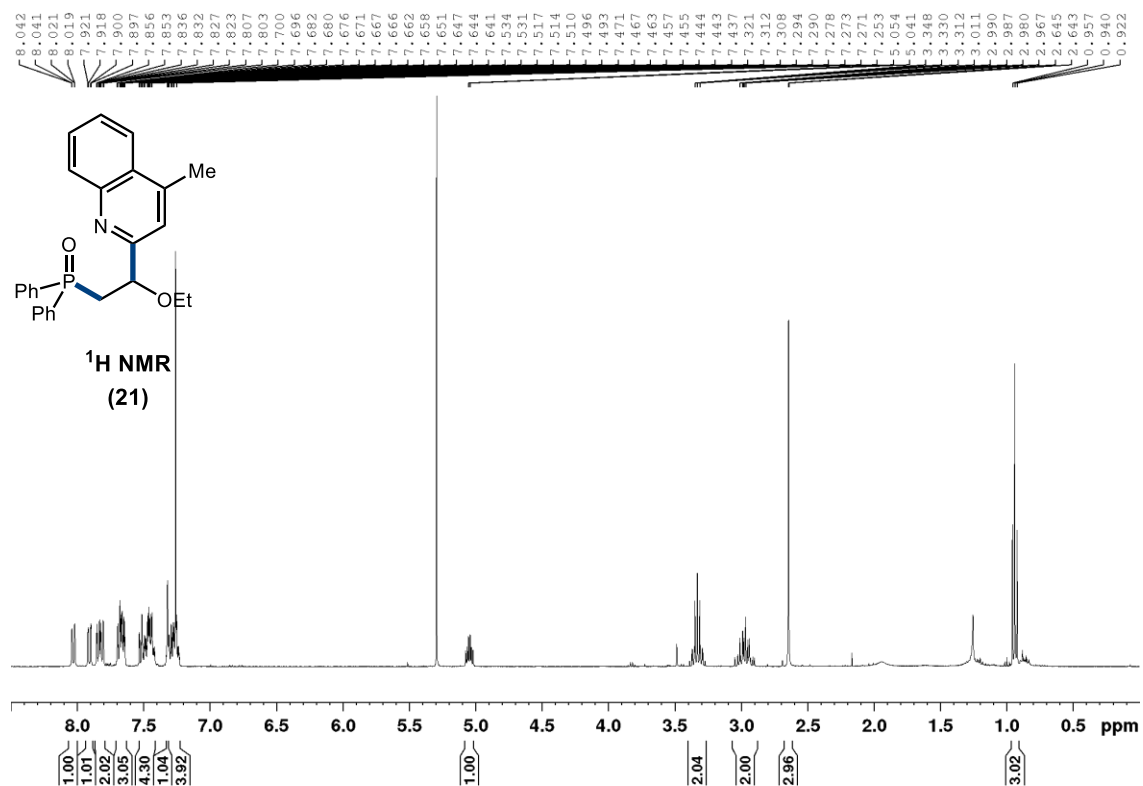

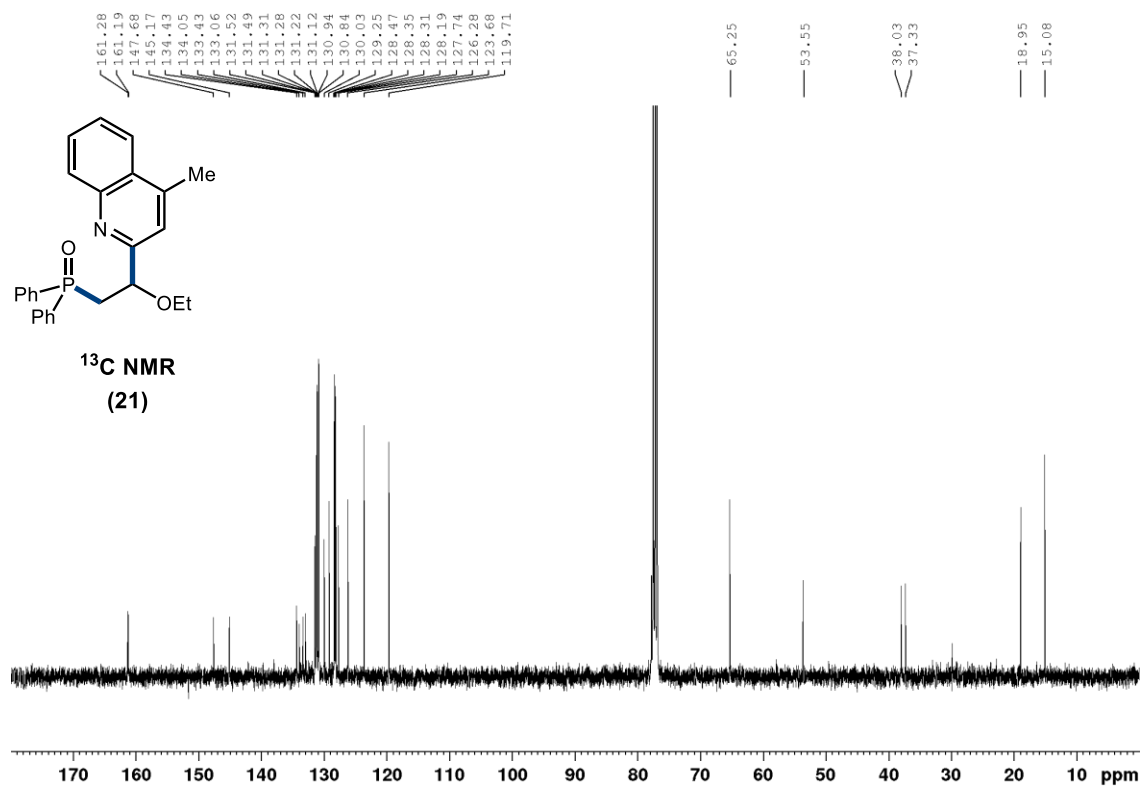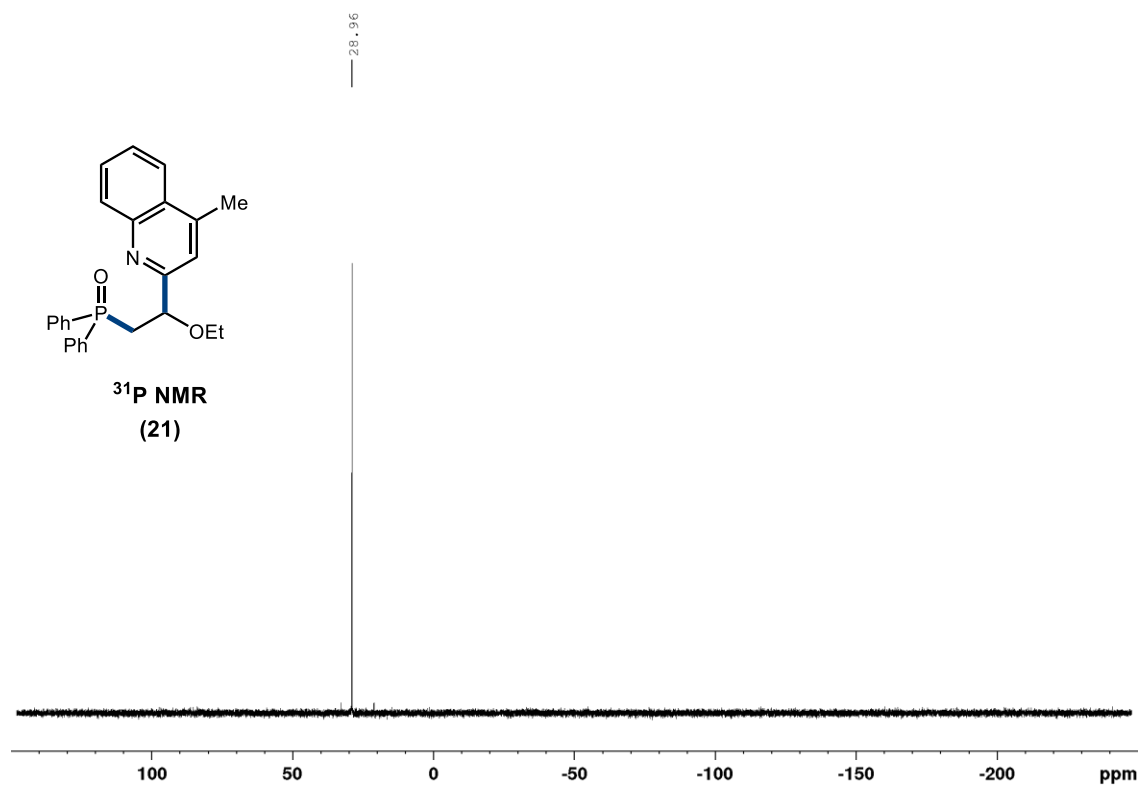

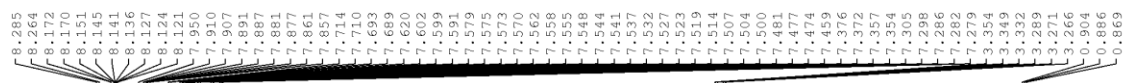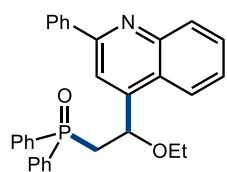

<sup>1</sup>H NMR  
(22)

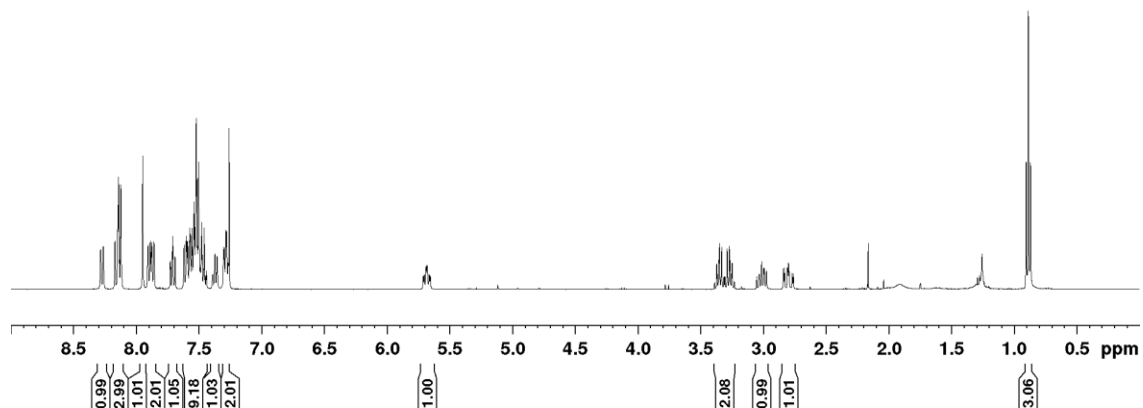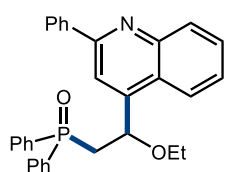

<sup>13</sup>C NMR  
(22)

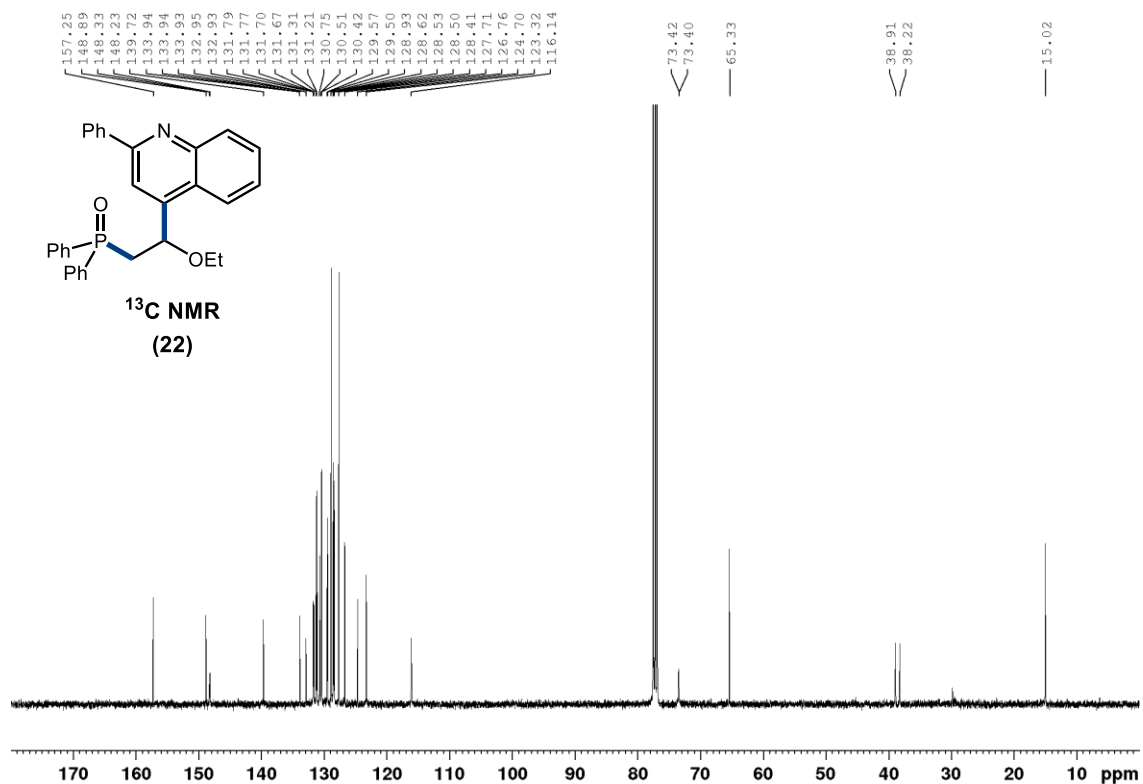

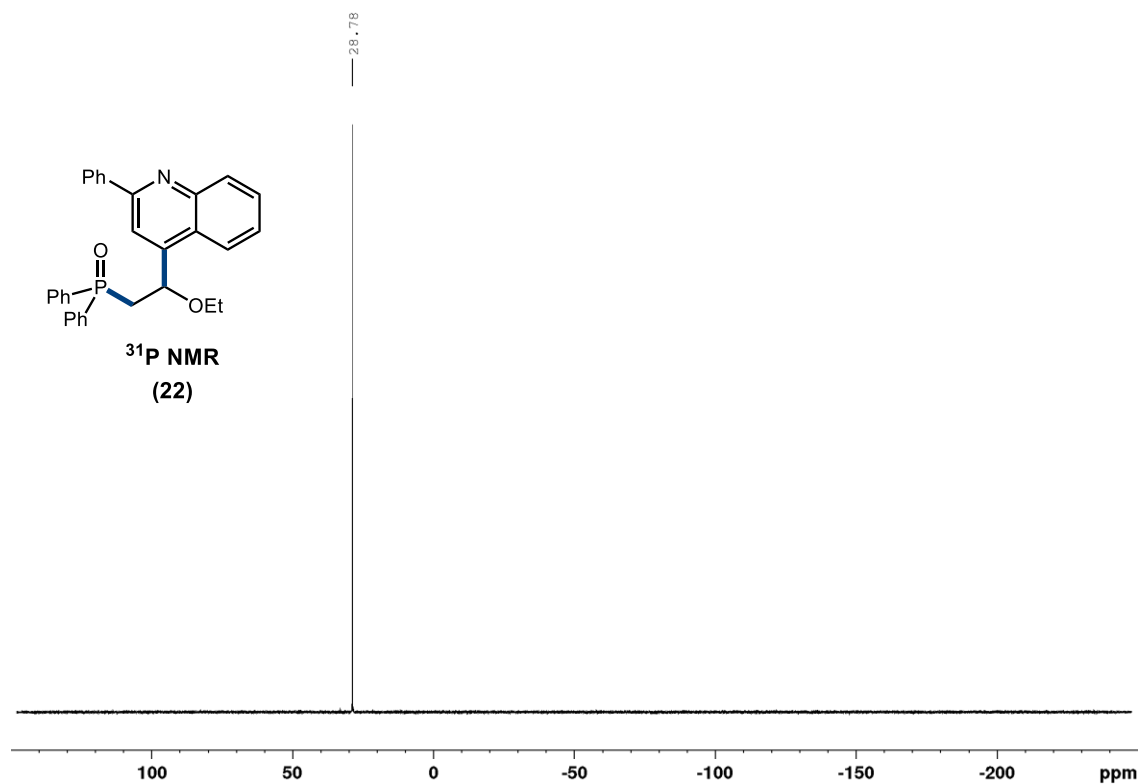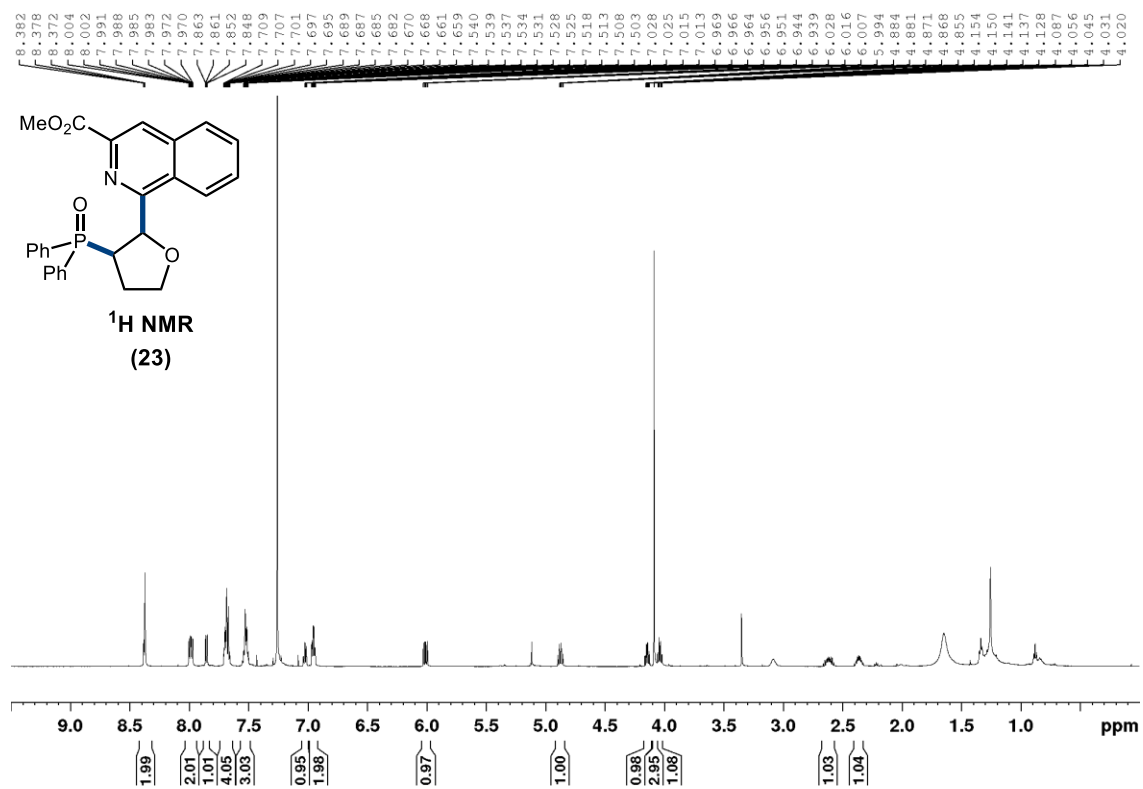

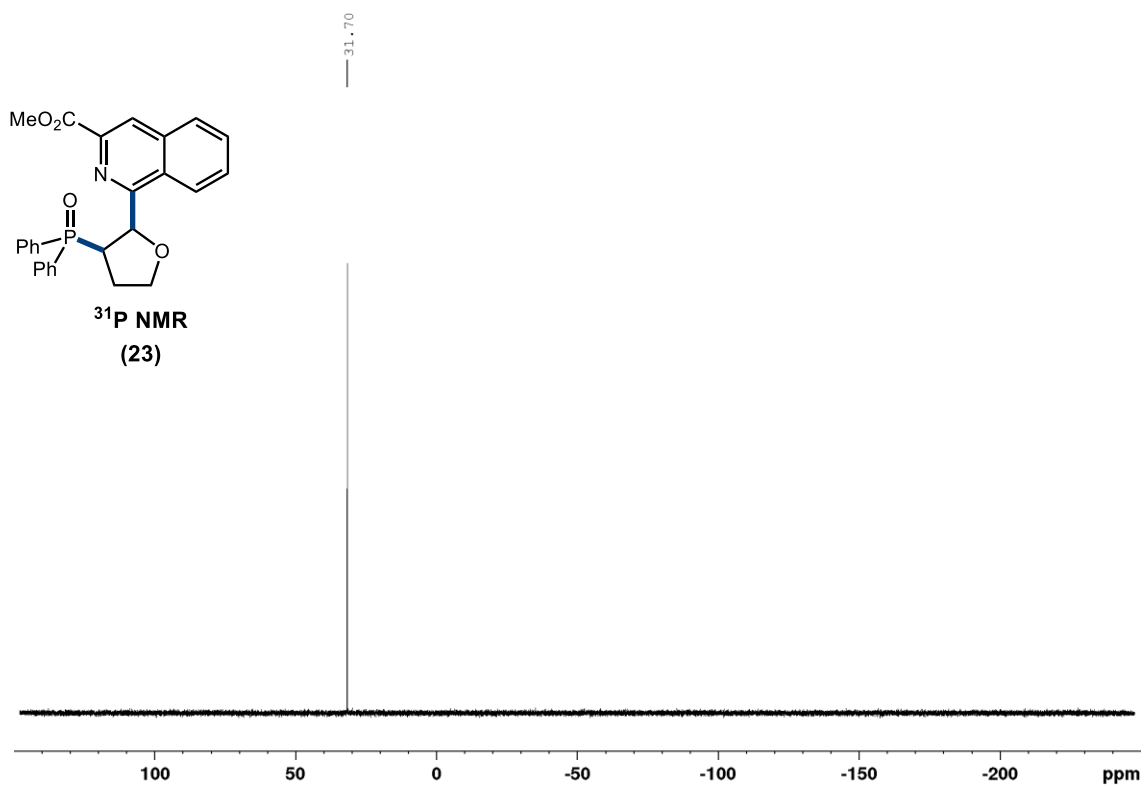

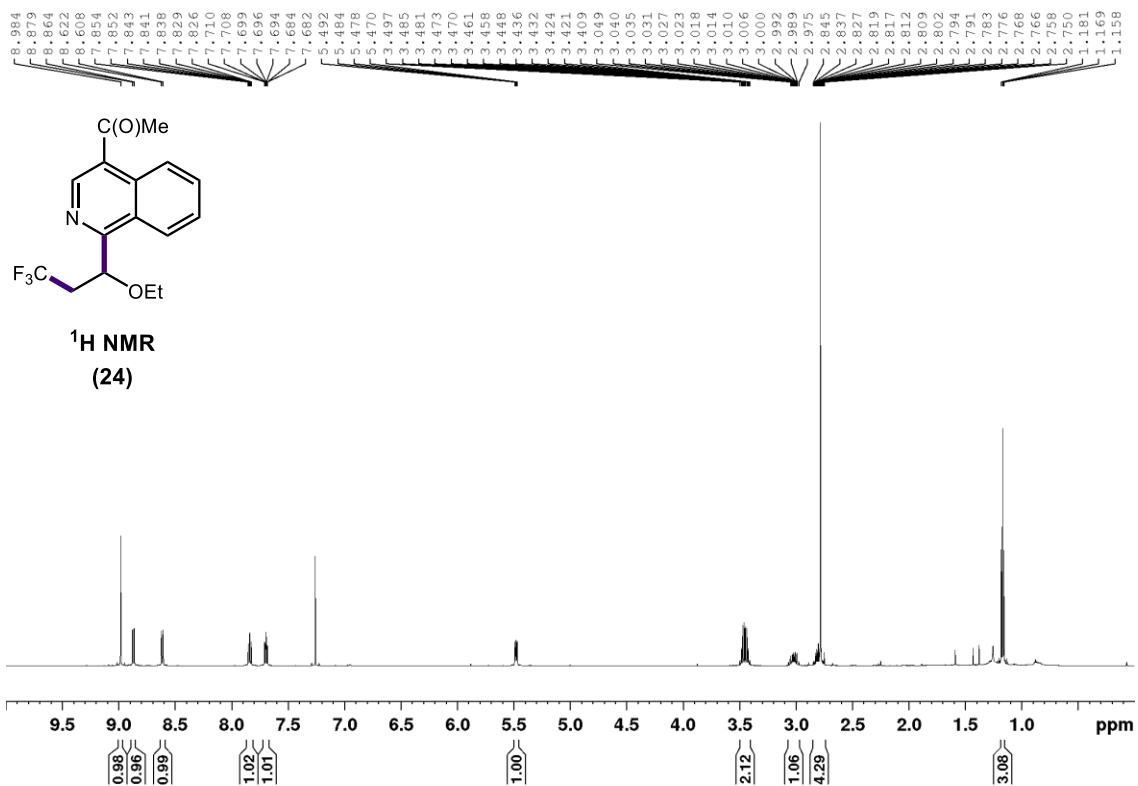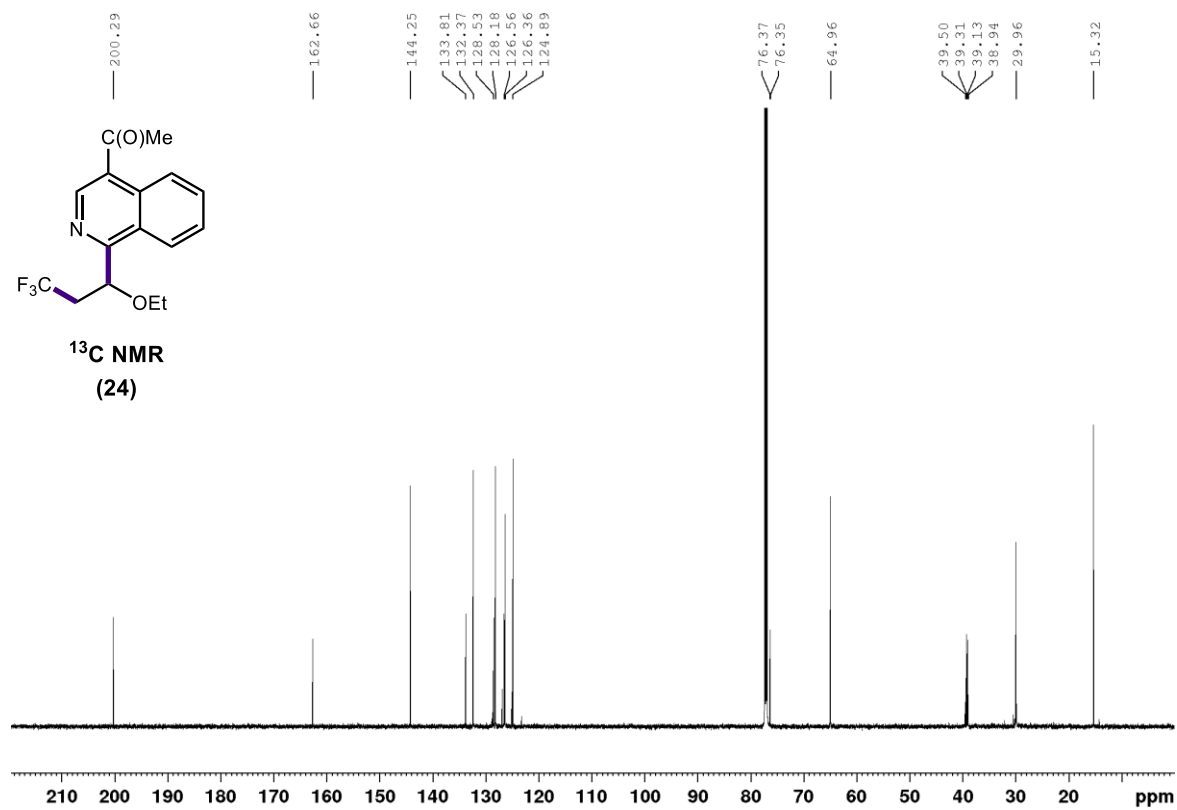

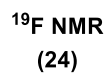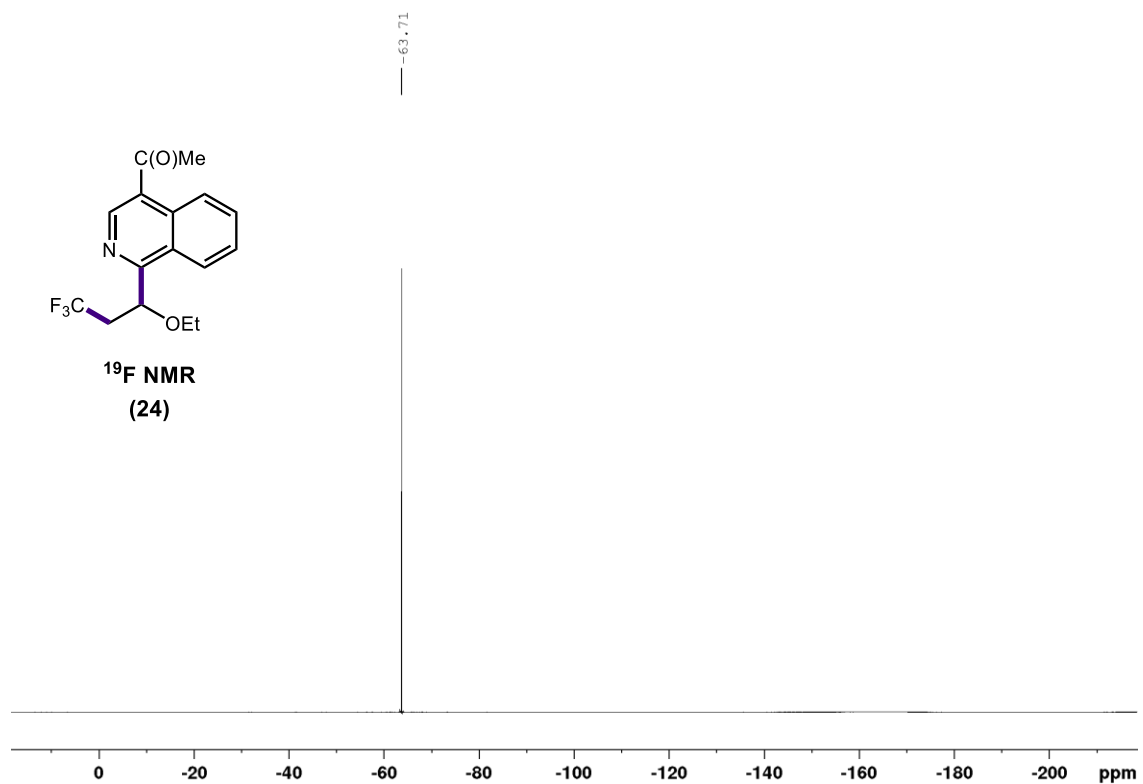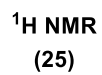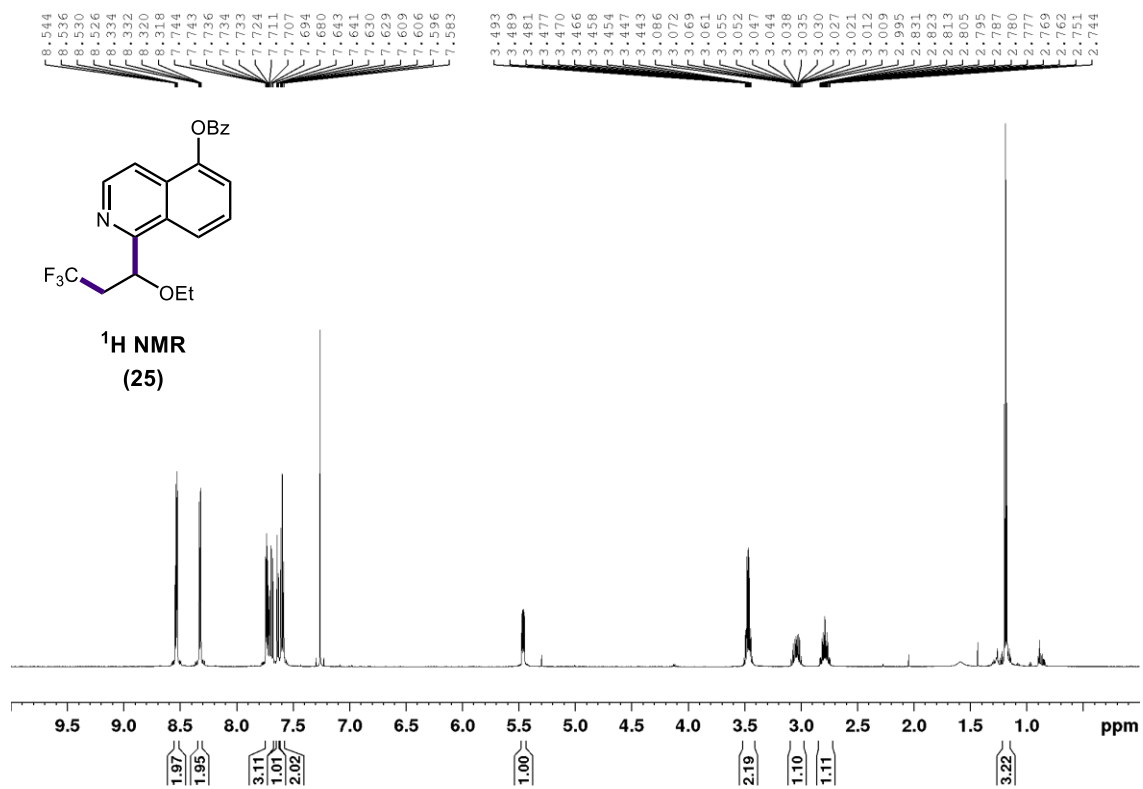

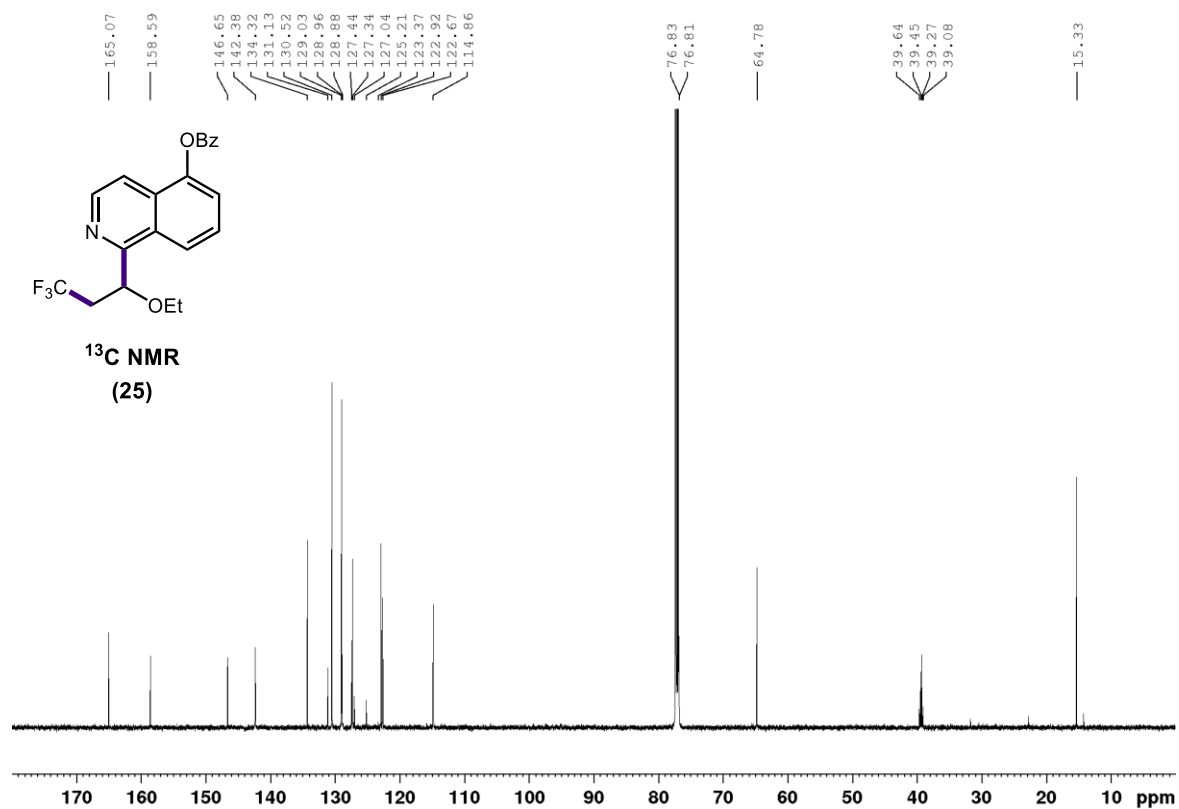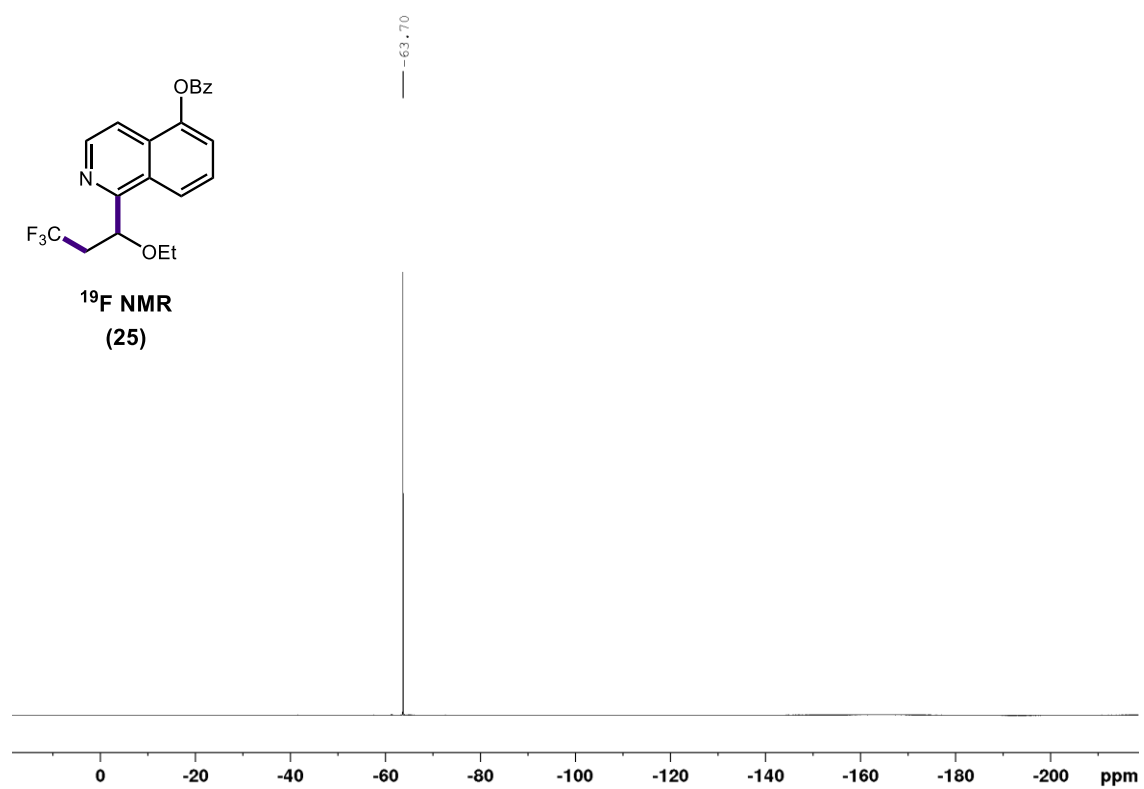



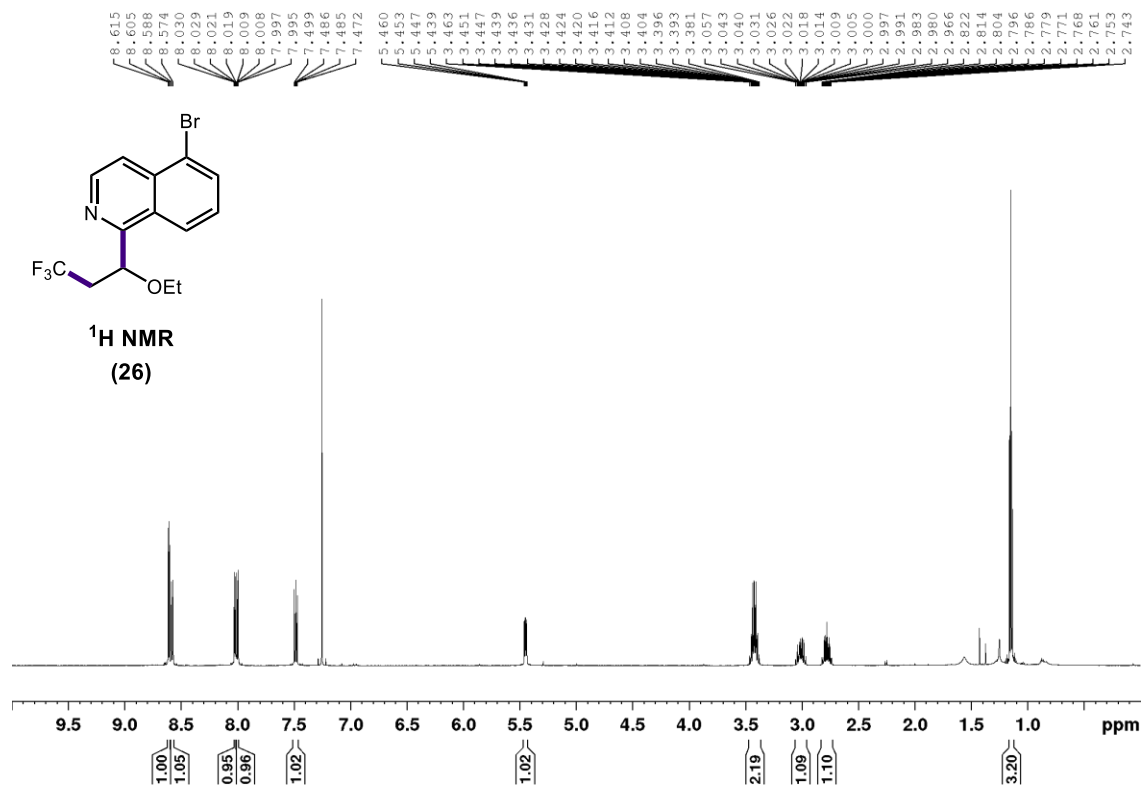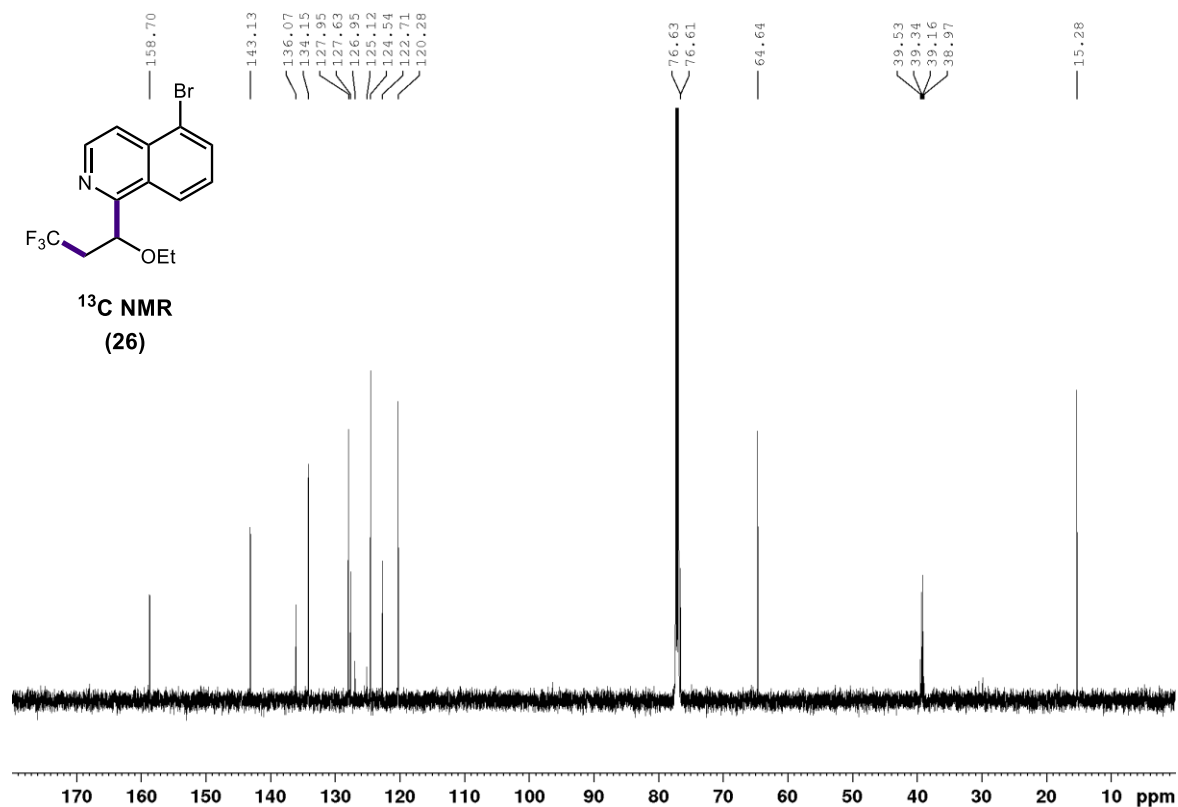

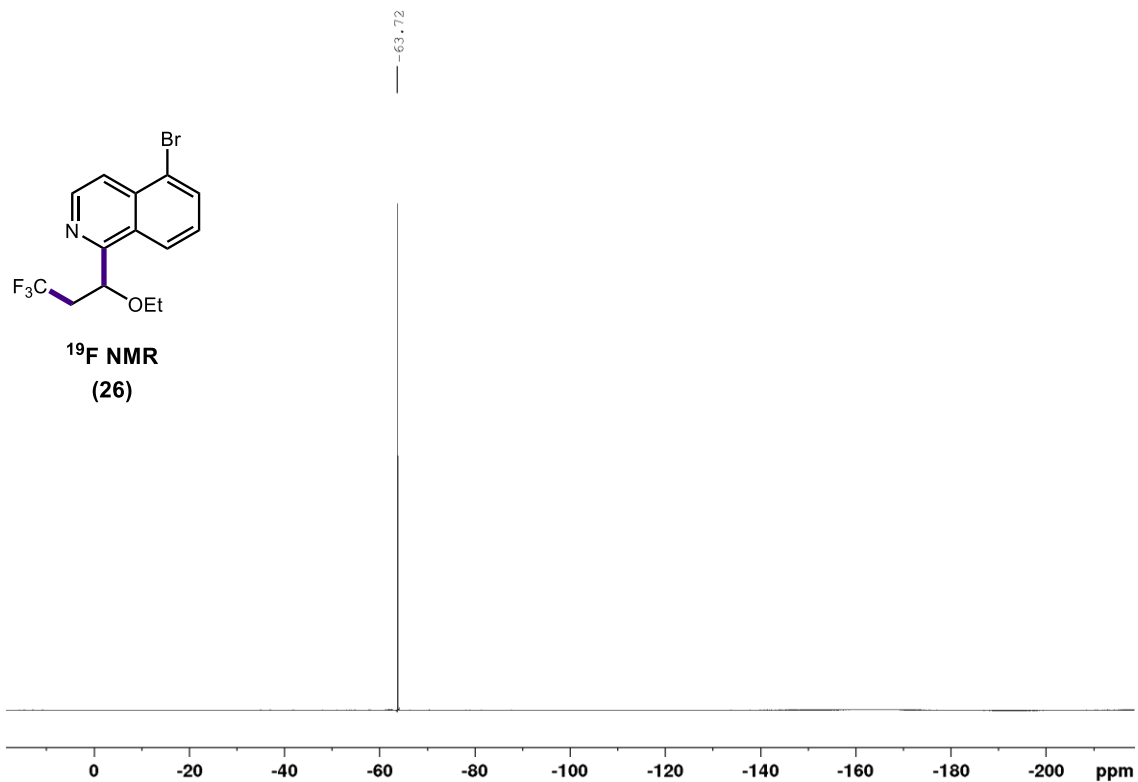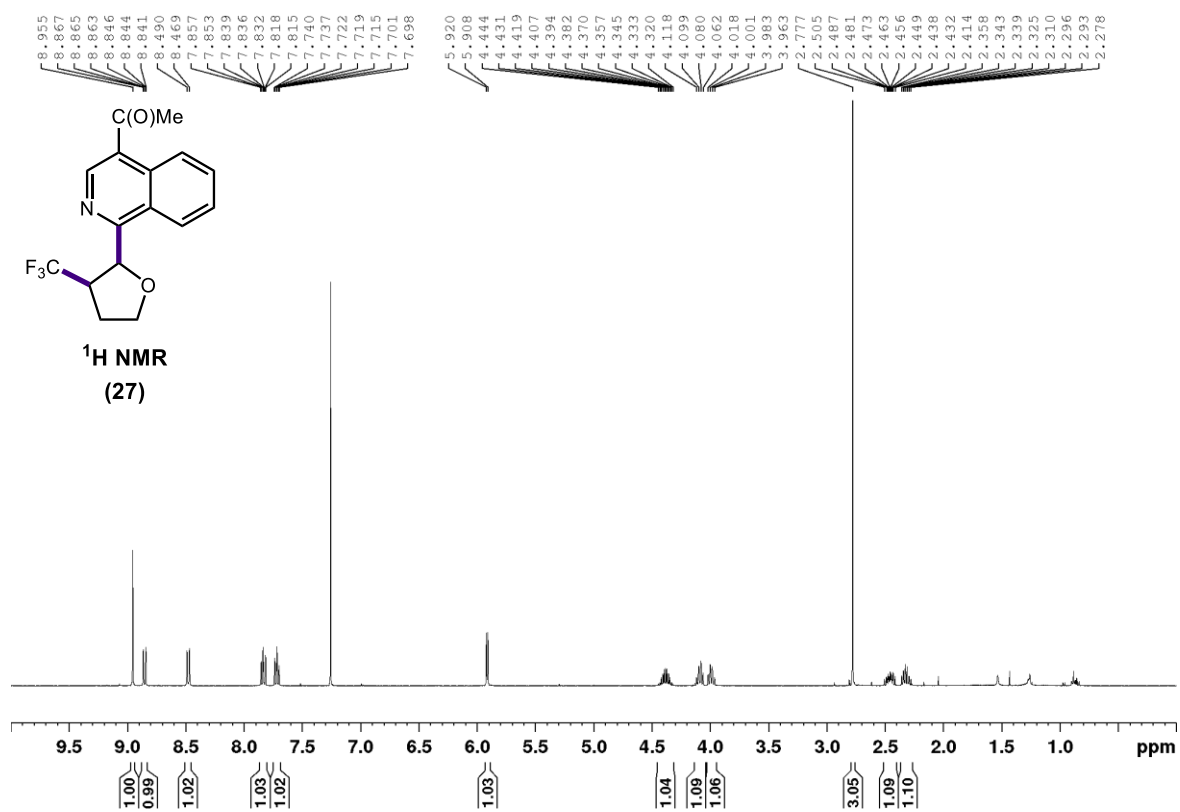

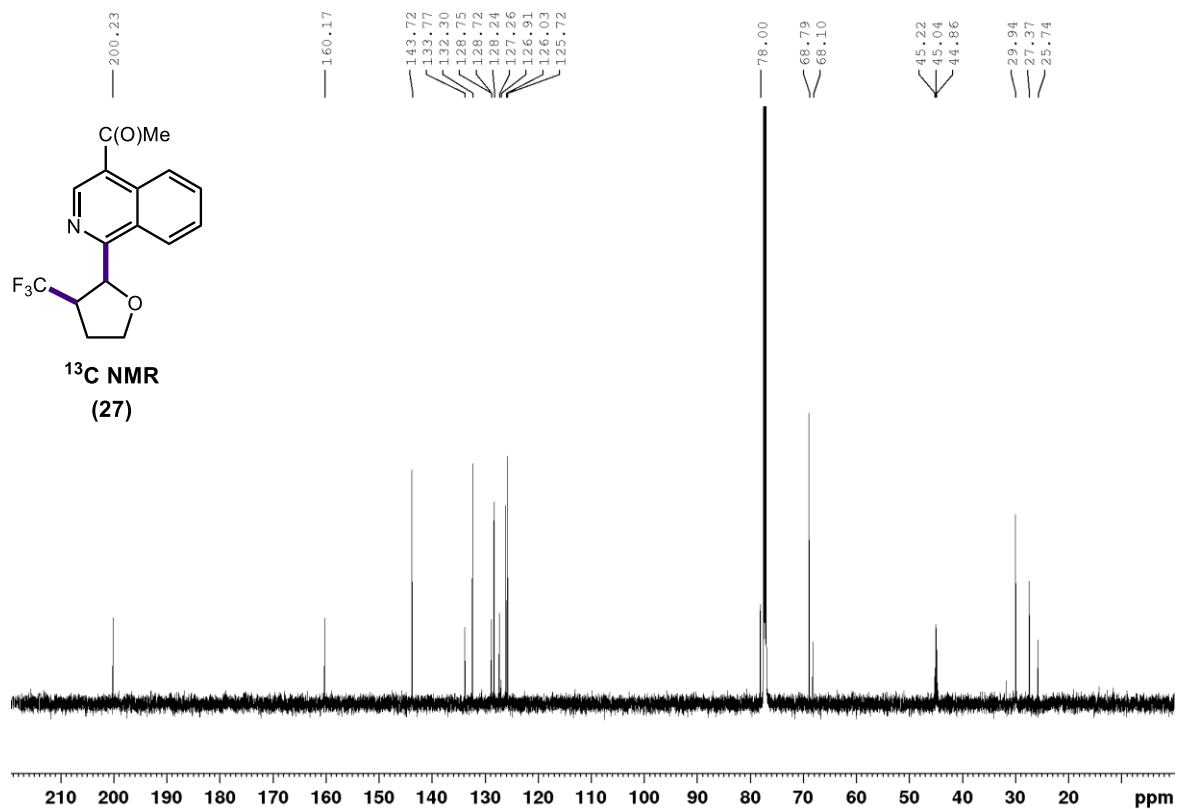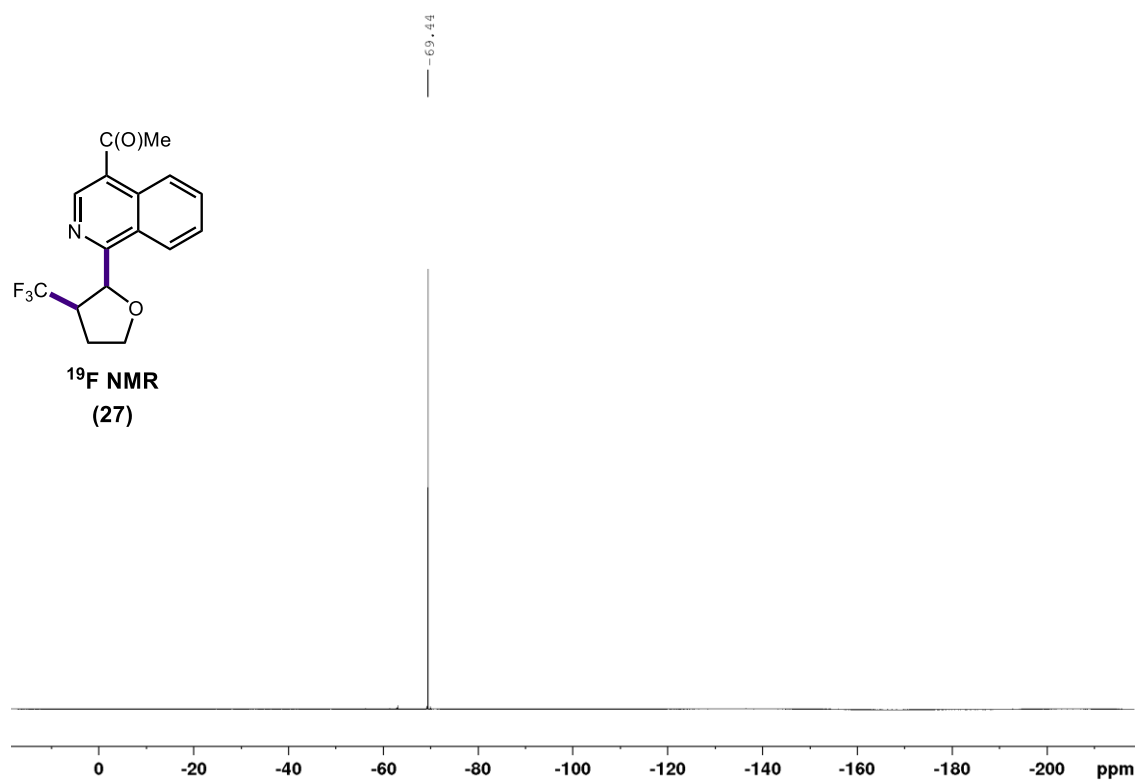

Supplement: c9cc03498f1.pdf [file c9cc03498f1.pdf]
